# Supplementary material for: A pooling-based approach to mapping genetic variants associated with DNA methylation
Source: HighWire-hosted journal article supplement (doi:10.1101/gr.183749.114), 2015-04-24
Supplement: mQTLList.xlsx [file mQTLList.xlsx]

## Sheet: Sheet1
rsID of Variant	Chromosome of Variant	Position of Variant	Chromosome of CpG	Position of CpG	p-Value	Chromatin State of CpG
Indel	chr1	1620058	chr1	1620025	1.3e-05	Weak Transcription
rs870171	chr1	3342804	chr1	3342805	0.000261	Quiescent/Low
rs12120656	chr1	3665867	chr1	3665872	0.000209	Repressed PolyComb
rs66849805	chr1	3789814	chr1	3789783	0.000405	Weak Transcription
rs113285680	chr1	4059758	chr1	4059753	0.000258	Repressed PolyComb
rs58983269	chr1	6421579	chr1	6421596	0.000214	Quiescent/Low
rs78039018	chr1	8711404	chr1	8711401	0.000231	Active Enhancer
rs1776218	chr1	10874056	chr1	10874029	0.000117	Repressed PolyComb
rs17036416	chr1	11211535	chr1	11211495	0.000125	Weak Transcription
rs12124853	chr1	11520952	chr1	11520989	0.000644	Repressed PolyComb
rs12124853	chr1	11520952	chr1	11520992	0.000371	Repressed PolyComb
Indel	chr1	11667085	chr1	11667078	0.000711	Repressed PolyComb
rs11121930	chr1	12616956	chr1	12616934	0.000874	Quiescent/Low
rs115983389	chr1	14907747	chr1	14907739	2e-05	Quiescent/Low
rs34638837	chr1	15357047	chr1	15357048	0.000608	Quiescent/Low
rs6669703	chr1	15411670	chr1	15411667	0.000923	Repressed PolyComb
rs7366554	chr1	17196806	chr1	17196811	0	Repressed PolyComb
rs7366554	chr1	17196806	chr1	17196838	1e-05	Repressed PolyComb
rs3750296	chr1	17559656	chr1	17559662	0.000461	Quiescent/Low
rs1253920	chr1	20918089	chr1	20918090	0.000182	Repressed PolyComb
rs12073342	chr1	21531305	chr1	21531300	0.000668	Repressed PolyComb
rs12074015	chr1	22304428	chr1	22304429	3.2e-05	Repressed PolyComb
rs1320690	chr1	23732444	chr1	23732442	9.3e-05	Repressed PolyComb
rs2502973	chr1	24223775	chr1	24223843	2.6e-05	Acetylated Active Enhancer
rs7534070	chr1	25498175	chr1	25498176	5.9e-05	Repressed PolyComb
rs59935516	chr1	25773026	chr1	25773027	0.000322	Active Enhancer
rs3104434	chr1	31023291	chr1	31023296	0.000494	Quiescent/Low
rs12079905	chr1	32059773	chr1	32059757	3.8e-05	CTCF Only
rs6677382	chr1	34653046	chr1	34653025	0.000797	Repressed PolyComb
rs78365410	chr1	35416607	chr1	35416637	0.000915	Quiescent/Low
rs7540086	chr1	37087090	chr1	37087088	3.3e-05	Repressed PolyComb
rs1466424	chr1	38587171	chr1	38587172	0.000608	Quiescent/Low
rs2773170	chr1	38730271	chr1	38730260	0.000291	Quiescent/Low
rs12402241	chr1	41270314	chr1	41270285	0.000198	Weak Enhancer
rs12402241	chr1	41270314	chr1	41270290	0.000796	Weak Enhancer
rs12402241	chr1	41270314	chr1	41270296	3.3e-05	Weak Enhancer
rs1540975	chr1	42420940	chr1	42420938	0.000679	Acetylated Active Enhancer
Indel	chr1	45619459	chr1	45619479	0.000156	Repressed PolyComb
rs2457057	chr1	48102984	chr1	48103004	0.000414	Repressed PolyComb
rs6675019	chr1	48418262	chr1	48418260	0.000987	Quiescent/Low
rs11205949	chr1	52744754	chr1	52744795	0.000624	Quiescent/Low
rs10157941	chr1	53548986	chr1	53548996	0.000516	Quiescent/Low
rs10157941	chr1	53548986	chr1	53549020	0.000777	Quiescent/Low
rs149241157	chr1	55642277	chr1	55642287	0.000543	Strong Transcription
rs10888935	chr1	56060951	chr1	56060953	0.000632	Quiescent/Low
rs144979442	chr1	56129433	chr1	56129450	1.2e-05	Quiescent/Low
rs78537439	chr1	57762795	chr1	57762798	0.000535	Quiescent/Low
rs72679787	chr1	62688422	chr1	62688419	0.000791	Quiescent/Low
rs72929743	chr1	62864112	chr1	62864131	0.000477	Repressed PolyComb
rs3737895	chr1	63627268	chr1	63627298	0.000575	Repressed PolyComb
rs1854335	chr1	63703330	chr1	63703328	0	Quiescent/Low
rs12120883	chr1	64612123	chr1	64612145	0.000825	Repressed PolyComb
rs10128072	chr1	65957096	chr1	65957094	9e-06	Quiescent/Low
rs4570372	chr1	71056594	chr1	71056827	0.000733	Quiescent/Low
rs17091221	chr1	71905723	chr1	71905732	0.000116	Quiescent/Low
rs2165950	chr1	75868643	chr1	75868633	0.000758	Quiescent/Low
rs74096015	chr1	79573899	chr1	79573949	0.0005	Quiescent/Low
Indel	chr1	80294575	chr1	80294586	4.9e-05	Quiescent/Low
rs10874193	chr1	81454728	chr1	81454768	9.9e-05	Quiescent/Low
rs5744302	chr1	86934908	chr1	86934902	0.000329	Repressed PolyComb
rs928654	chr1	89849441	chr1	89849750	0.000987	Repressed PolyComb
rs1765623	chr1	94856402	chr1	94856408	8.4e-05	Repressed PolyComb
rs10874895	chr1	95311928	chr1	95311919	0.000815	Repressed PolyComb
rs6680011	chr1	95840866	chr1	95840842	0.000562	Quiescent/Low
rs12564173	chr1	96311796	chr1	96311797	2e-06	Quiescent/Low
rs72971892	chr1	100599478	chr1	100599498	3.8e-05	Flanking Active TSS
rs12095108	chr1	101254422	chr1	101254428	2.8e-05	Repressed PolyComb
rs12047018	chr1	105276205	chr1	105276207	1.2e-05	Quiescent/Low
rs12126615	chr1	105448030	chr1	105448006	0.000959	Weak Enhancer
rs7528412	chr1	108076328	chr1	108076341	0.000409	Quiescent/Low
rs17027773	chr1	112020453	chr1	112020438	0.0002	Active Enhancer
rs116398413	chr1	112146732	chr1	112146721	0.00089	Active Enhancer
rs1805257	chr1	120552215	chr1	120552205	0.000285	Repressed PolyComb
rs142011633	chr1	142545956	chr1	142546138	2.5e-05	Quiescent/Low
rs61806304	chr1	142571242	chr1	142571075	1e-06	Quiescent/Low
rs151179992	chr1	143131385	chr1	143131378	4e-06	Weak Transcription
rs151179992	chr1	143131385	chr1	143131396	5.3e-05	Weak Transcription
Indel	chr1	144547058	chr1	144547037	0	Bivalent Enhancer
rs2653671	chr1	144586349	chr1	144586314	5.1e-05	Repressed PolyComb
rs146039758	chr1	144591752	chr1	144591771	2e-05	Repressed PolyComb
Indel	chr1	144865850	chr1	144865805	0.000414	Quiescent/Low
Indel	chr1	144865850	chr1	144865845	0.000184	Quiescent/Low
Indel	chr1	144873962	chr1	144873949	3.4e-05	Quiescent/Low
Indel	chr1	144930571	chr1	144930524	9e-05	Flanking Active TSS
Indel	chr1	144930596	chr1	144930524	0.000874	Flanking Active TSS
rs4950437	chr1	146927395	chr1	146927359	0.000575	Quiescent/Low
Indel	chr1	147298952	chr1	147298992	0.000777	Repressed PolyComb
rs147528133	chr1	148532788	chr1	148532791	3.4e-05	Quiescent/Low
rs28657845	chr1	149333365	chr1	149333369	0.000324	Repressed PolyComb
rs4649590	chr1	149673227	chr1	149673193	7e-05	Bivalent TSS
rs4649590	chr1	149673227	chr1	149673231	2e-06	Bivalent TSS
rs4649590	chr1	149673227	chr1	149673253	0.000722	Bivalent TSS
rs10888569	chr1	150025672	chr1	150025669	0.000626	Weak Enhancer
rs10888569	chr1	150025672	chr1	150025673	3e-05	Weak Enhancer
rs4323653	chr1	152983359	chr1	152983357	1e-06	Quiescent/Low
rs4323653	chr1	152983359	chr1	152983367	0.000348	Quiescent/Low
rs6427085	chr1	153687227	chr1	153687231	0.000716	Repressed PolyComb
rs57184806	chr1	154745206	chr1	154745202	0.000142	Weak Enhancer (Genic)
rs2038777	chr1	158093040	chr1	158093045	0.000139	Repressed PolyComb
rs12064129	chr1	159146930	chr1	159146921	0.00079	Repressed PolyComb
rs7530926	chr1	159574903	chr1	159574897	0.000353	Quiescent/Low
rs60205880	chr1	159791464	chr1	159791473	0	CTCF Only
rs60205880	chr1	159791464	chr1	159791497	1e-06	CTCF Only
rs2499835	chr1	161968748	chr1	161968731	0.000915	Repressed PolyComb
rs1704757	chr1	162837806	chr1	162837800	0.000954	Repressed PolyComb
rs1415434	chr1	164173124	chr1	164173122	0.000919	Quiescent/Low
rs10918475	chr1	166441111	chr1	166441121	9.8e-05	Quiescent/Low
rs988239	chr1	167108800	chr1	167108817	0.000614	Repressed PolyComb
rs2861451	chr1	167312409	chr1	167312417	3.5e-05	Weak Enhancer (Genic)
rs754549	chr1	169087964	chr1	169087988	0.000501	Weak Transcription
rs1576946	chr1	170331510	chr1	170331497	0.000144	Quiescent/Low
rs675761	chr1	170601817	chr1	170601804	0.000176	Quiescent/Low
rs28369794	chr1	171154303	chr1	171154301	0.000144	Repressed PolyComb
rs4652130	chr1	175809524	chr1	175809483	0.000202	Repressed PolyComb
rs4075631	chr1	178506594	chr1	178506613	0.000835	Quiescent/Low
rs59601261	chr1	180809230	chr1	180809231	0.000229	Quiescent/Low
rs2262513	chr1	181914287	chr1	181914294	0	Repressed PolyComb
rs35855069	chr1	183115341	chr1	183115323	0.0002	Quiescent/Low
rs10797916	chr1	183838058	chr1	183838064	0.000333	Strong Transcription
rs10752924	chr1	183887032	chr1	183887048	0.000128	Strong Transcription
rs6665419	chr1	186674561	chr1	186674559	2e-06	Quiescent/Low
rs6425081	chr1	187154682	chr1	187154683	0.000711	Quiescent/Low
rs7355114	chr1	187754760	chr1	187754756	0.000259	Quiescent/Low
rs116318948	chr1	187771534	chr1	187771528	0.00092	Quiescent/Low
Indel	chr1	189087000	chr1	189086991	0.00089	Quiescent/Low
rs816818	chr1	189423944	chr1	189423947	0.000542	Quiescent/Low
rs12755536	chr1	190824396	chr1	190824402	2.6e-05	Quiescent/Low
rs1327440	chr1	193899103	chr1	193899071	0.000816	Quiescent/Low
rs10921793	chr1	195086422	chr1	195086799	0.000248	Quiescent/Low
rs10737680	chr1	196679455	chr1	196679457	4.3e-05	Quiescent/Low
rs377121	chr1	196773728	chr1	196773721	0.000128	Quiescent/Low
rs4971252	chr1	203320408	chr1	203320396	0.000341	Repressed PolyComb
rs76598035	chr1	204097047	chr1	204097064	0.000884	CTCF Only
rs61443399	chr1	204115271	chr1	204115272	0.000425	Repressed PolyComb
rs750088	chr1	204810195	chr1	204810191	0.000724	Quiescent/Low
rs11811891	chr1	208314320	chr1	208314311	0.0003	Repressed PolyComb
rs6658899	chr1	211015839	chr1	211015827	0.000463	Quiescent/Low
rs6659806	chr1	213707275	chr1	213707269	2e-06	Quiescent/Low
rs11803401	chr1	219785593	chr1	219785618	0.000629	Quiescent/Low
rs17006805	chr1	220068844	chr1	220068839	0.000839	Repressed PolyComb
rs57651577	chr1	221079756	chr1	221079754	0.000346	Repressed PolyComb
rs9970595	chr1	221475277	chr1	221475264	3.6e-05	Repressed PolyComb
rs7355053	chr1	221829784	chr1	221829759	0.000346	Quiescent/Low
rs77365320	chr1	222562589	chr1	222562587	4e-06	Quiescent/Low
rs12094613	chr1	223833835	chr1	223833832	0.000965	Repressed PolyComb
rs6426080	chr1	225743040	chr1	225743050	0.000669	Repressed PolyComb
rs1094658	chr1	231773397	chr1	231773380	0.0005	Repressed PolyComb
rs638070	chr1	233821279	chr1	233821260	0.000202	Quiescent/Low
rs78281213	chr1	234624228	chr1	234624247	6.7e-05	Acetylated Active Enhancer
rs6704501	chr1	236635985	chr1	236636005	0.000555	Repressed PolyComb
rs4659471	chr1	236937168	chr1	236937175	0.000693	Quiescent/Low
rs10925637	chr1	238560794	chr1	238560769	0.00048	Quiescent/Low
rs1543015	chr1	239255671	chr1	239255667	0.00018	Quiescent/Low
rs61830783	chr1	240176290	chr1	240176301	2.6e-05	Quiescent/Low
rs9725359	chr1	240533352	chr1	240533356	0	Quiescent/Low
rs6690744	chr1	241133560	chr1	241133546	0.000433	Quiescent/Low
rs6698254	chr1	242002481	chr1	242002464	0.000562	Active Enhancer
rs4087223	chr1	242238510	chr1	242238514	0.000973	Quiescent/Low
rs2654886	chr1	242689559	chr1	242689548	0.000851	Repressed PolyComb
rs115859273	chr1	243105841	chr1	243105854	6.8e-05	Quiescent/Low
rs57433787	chr1	244487967	chr1	244487929	1.5e-05	Active TSS
rs10924421	chr1	246150334	chr1	246150363	0.000752	Quiescent/Low
rs6699888	chr1	246383023	chr1	246383021	2e-06	Quiescent/Low
rs2642955	chr1	247170270	chr1	247170254	0.00039	Flanking Active TSS
rs4925590	chr1	247291146	chr1	247291121	0.000877	Acetylated Active Enhancer (Genic)
rs10924980	chr1	247445650	chr1	247445652	0.000547	Quiescent/Low
rs28812571	chr1	248561812	chr1	248561805	0.000922	Repressed PolyComb
rs149694364	chr1	248605183	chr1	248605167	0.000965	Quiescent/Low
rs142443076	chr1	248638774	chr1	248638637	0.000462	Weak Transcription
rs28523346	chr1	248822389	chr1	248822406	0.000513	Weak Enhancer
rs2820662	chr10	1461139	chr10	1461118	0.000411	Repressed PolyComb
rs148663180	chr10	2316239	chr10	2316240	0.000784	Quiescent/Low
rs80073506	chr10	3457702	chr10	3457687	0.000137	Quiescent/Low
rs10508279	chr10	4300734	chr10	4300729	2.6e-05	Repressed PolyComb
rs313460	chr10	4673786	chr10	4673787	1e-06	Quiescent/Low
rs4406725	chr10	4926266	chr10	4926253	0.000716	Quiescent/Low
rs11253973	chr10	6717791	chr10	6717768	0.000714	Repressed PolyComb
rs7906214	chr10	7021163	chr10	7021145	0.000371	Repressed PolyComb
Indel	chr10	7543487	chr10	7543515	2.1e-05	Weak Enhancer
rs17145345	chr10	9210500	chr10	9210498	0.000753	Quiescent/Low
rs11257367	chr10	11905880	chr10	11905876	0.000167	Weak Enhancer
rs2768450	chr10	12490651	chr10	12490659	7.1e-05	Acetylated Active Enhancer
rs963335	chr10	12924659	chr10	12924656	5.2e-05	Repressed PolyComb
rs73583877	chr10	13037255	chr10	13037388	2.3e-05	Repressed PolyComb
rs4750308	chr10	13116699	chr10	13116697	1e-05	CTCF Only
rs744443	chr10	14122981	chr10	14122963	0.000834	Repressed PolyComb
rs2007904	chr10	18292596	chr10	18292614	1.2e-05	Repressed PolyComb
rs11013375	chr10	18581836	chr10	18581832	0.000602	Weak Enhancer
rs4748586	chr10	19759812	chr10	19759809	6.5e-05	Quiescent/Low
rs16922574	chr10	22950784	chr10	22950766	9.7e-05	Weak Transcription
rs7918259	chr10	23364530	chr10	23364527	0.000439	Weak Enhancer
rs6482339	chr10	24029826	chr10	24029811	0.000851	Quiescent/Low
rs6482400	chr10	24853886	chr10	24853891	0.000301	Repressed PolyComb
rs7099328	chr10	25663665	chr10	25663656	0.000401	Quiescent/Low
rs10828888	chr10	26147412	chr10	26147430	0.000939	Quiescent/Low
rs12250172	chr10	27240716	chr10	27240708	2.5e-05	Quiescent/Low
rs11006921	chr10	28501633	chr10	28501599	0.00097	Quiescent/Low
rs11007200	chr10	28991782	chr10	28991778	9e-06	Repressed PolyComb
rs789930	chr10	29612818	chr10	29612816	0.000165	Repressed PolyComb
rs55637059	chr10	30205444	chr10	30205468	0.000777	Repressed PolyComb
rs10826834	chr10	30936214	chr10	30936246	9.5e-05	Repressed PolyComb
rs2998049	chr10	32466997	chr10	32466978	0.000108	Quiescent/Low
rs57458062	chr10	33768941	chr10	33768942	0.000325	Quiescent/Low
rs2225486	chr10	34133244	chr10	34133256	3e-06	Quiescent/Low
rs4145087	chr10	34347152	chr10	34347165	1e-06	Quiescent/Low
rs72793326	chr10	36405765	chr10	36405771	0.000222	Quiescent/Low
rs3003641	chr10	36899463	chr10	36899458	0.000557	Quiescent/Low
rs10734022	chr10	37245232	chr10	37245229	0.000311	Quiescent/Low
rs2505256	chr10	38369818	chr10	38369787	0.000714	Quiescent/Low
Indel	chr10	38498329	chr10	38498347	8.7e-05	Quiescent/Low
rs191640294	chr10	42777255	chr10	42777285	0.000538	Quiescent/Low
rs2505862	chr10	42907551	chr10	42907552	1.4e-05	Quiescent/Low
rs800330	chr10	44805952	chr10	44805984	0.000733	Weak Enhancer
rs4514346	chr10	47642040	chr10	47642324	0.000414	Weak Enhancer
rs4101281	chr10	49779790	chr10	49779944	0.000393	Weak Enhancer
rs142518542	chr10	52627601	chr10	52627602	0.000466	Repressed PolyComb
rs11003261	chr10	54684569	chr10	54684583	0.000108	Quiescent/Low
rs7099039	chr10	56378165	chr10	56378163	8e-06	Quiescent/Low
rs7920223	chr10	56860132	chr10	56860155	0.000965	Quiescent/Low
rs7094185	chr10	58944057	chr10	58944049	8.1e-05	Quiescent/Low
Indel	chr10	59563014	chr10	59563024	0.000335	Quiescent/Low
Indel	chr10	60200420	chr10	60200412	0.000108	Quiescent/Low
rs79041836	chr10	60613841	chr10	60613837	0.000385	Quiescent/Low
rs12243974	chr10	61314805	chr10	61314815	3e-06	Quiescent/Low
rs7908312	chr10	61997885	chr10	61997847	9.5e-05	Acetylated Active Enhancer
rs1903206	chr10	62100417	chr10	62100389	0.000157	Repressed PolyComb
rs192527944	chr10	64366699	chr10	64366676	0.000777	Repressed PolyComb
rs12264429	chr10	67108265	chr10	67108259	1.9e-05	Quiescent/Low
rs10761970	chr10	67160860	chr10	67160801	0.000777	Quiescent/Low
rs77335551	chr10	68549227	chr10	68549228	0.000696	Quiescent/Low
rs12781257	chr10	68631599	chr10	68631619	5.4e-05	Quiescent/Low
rs116329084	chr10	69402912	chr10	69402918	1.6e-05	Quiescent/Low
rs78983061	chr10	70982142	chr10	70982166	0.000272	Acetylated Active Enhancer
rs2812504	chr10	71421202	chr10	71421203	0.00016	Repressed PolyComb
rs10762400	chr10	72484943	chr10	72484954	0.000341	Quiescent/Low
rs10823774	chr10	73280699	chr10	73280701	0.000531	Repressed PolyComb
rs12262714	chr10	74781882	chr10	74781865	0.000567	Strong Transcription
rs6480781	chr10	77140707	chr10	77140704	0	Repressed PolyComb
rs77161384	chr10	78364987	chr10	78365249	0.000562	Quiescent/Low
rs4357630	chr10	78382883	chr10	78382865	0.000625	Quiescent/Low
rs1863889	chr10	81389600	chr10	81389594	3.6e-05	Quiescent/Low
rs7068350	chr10	81434379	chr10	81434396	6.7e-05	Weak Enhancer
rs61859978	chr10	81886241	chr10	81886246	3.4e-05	Quiescent/Low
rs3120976	chr10	82025682	chr10	82025680	7.1e-05	Repressed PolyComb
rs148303158	chr10	82069164	chr10	82069416	0.000874	Quiescent/Low
Indel	chr10	83490168	chr10	83490200	0.000364	Quiescent/Low
rs12258538	chr10	85613505	chr10	85613532	0.000635	Quiescent/Low
rs2960361	chr10	86574540	chr10	86574535	0.000843	Repressed PolyComb
rs1933955	chr10	86750871	chr10	86750869	0.000761	Quiescent/Low
rs73351684	chr10	88021822	chr10	88021860	0.000435	CTCF Only
rs77445746	chr10	88713219	chr10	88713214	0.000806	Repressed PolyComb
rs6583694	chr10	91933447	chr10	91933460	0.000628	Quiescent/Low
rs7084168	chr10	97995658	chr10	97995635	8.6e-05	Active Enhancer (Genic)
rs6584097	chr10	98429041	chr10	98429068	4e-05	Active Enhancer (Genic)
rs2817699	chr10	98873576	chr10	98873600	0.000423	Repressed PolyComb
Indel	chr10	99159716	chr10	99159940	0.000152	Flanking Active TSS
Indel	chr10	99159716	chr10	99159946	8.6e-05	Flanking Active TSS
rs11591622	chr10	102520687	chr10	102520689	0.00019	Repressed PolyComb
rs2096238	chr10	106787106	chr10	106787090	0.000841	Quiescent/Low
rs821700	chr10	108095630	chr10	108095631	5.9e-05	Quiescent/Low
rs7921594	chr10	109166391	chr10	109166410	0.000234	Quiescent/Low
rs12220284	chr10	111005281	chr10	111005279	1e-06	Quiescent/Low
rs74788389	chr10	111167747	chr10	111167742	0.000425	Quiescent/Low
rs7095712	chr10	111250420	chr10	111250418	3e-06	Quiescent/Low
rs7899873	chr10	111842267	chr10	111842281	0.000203	Active Enhancer (Genic)
rs4918504	chr10	112150377	chr10	112150381	2e-06	Active Enhancer
rs4918504	chr10	112150377	chr10	112150408	0.000542	Active Enhancer
rs61126189	chr10	113377917	chr10	113377918	0	Quiescent/Low
rs7088433	chr10	113731969	chr10	113731978	0.000431	Quiescent/Low
rs2483545	chr10	116317974	chr10	116317971	2.4e-05	Repressed PolyComb
rs11197046	chr10	116828771	chr10	116828773	2e-06	Repressed PolyComb
rs2183801	chr10	121937413	chr10	121937463	7.4e-05	Repressed PolyComb
rs7917351	chr10	122611772	chr10	122611790	0.00019	Active TSS
rs1048347	chr10	124096061	chr10	124096062	1.2e-05	Repressed PolyComb
rs7092625	chr10	124834747	chr10	124834744	0.000415	Quiescent/Low
rs7088604	chr10	125489695	chr10	125489683	0.000732	Quiescent/Low
rs17106056	chr10	125545837	chr10	125545831	0.000906	Repressed PolyComb
rs7901595	chr10	125831080	chr10	125831071	5e-06	Repressed PolyComb
rs2683587	chr10	126560077	chr10	126560075	0.000987	Repressed PolyComb
rs67429538	chr10	127584778	chr10	127584764	0	Active TSS
rs67429538	chr10	127584778	chr10	127584770	2e-06	Active TSS
rs67429538	chr10	127584778	chr10	127584793	0	Active TSS
rs67429538	chr10	127584778	chr10	127584796	0.000147	Active TSS
rs2498937	chr10	129047194	chr10	129047169	0.000897	Quiescent/Low
rs9663318	chr10	129128317	chr10	129128315	5e-06	Quiescent/Low
rs4080381	chr10	129350641	chr10	129350634	4e-06	Quiescent/Low
rs56227211	chr10	130362112	chr10	130362106	0.000983	Quiescent/Low
rs60084274	chr10	130544772	chr10	130544790	0	Repressed PolyComb
rs568226	chr10	131036757	chr10	131036748	0.000267	Quiescent/Low
rs181120524	chr10	131348602	chr10	131348589	0.000167	Quiescent/Low
rs1184944	chr10	131832148	chr10	131832132	0.000919	Repressed PolyComb
rs4578296	chr10	132296522	chr10	132296519	0.000391	Quiescent/Low
rs2660053	chr10	132575054	chr10	132575109	0.000371	Quiescent/Low
rs12778163	chr10	133041652	chr10	133041660	1.2e-05	Quiescent/Low
rs11812252	chr10	133335034	chr10	133335016	0.000346	Quiescent/Low
rs7087791	chr10	133938841	chr10	133938853	0.000565	Quiescent/Low
rs139032047	chr10	134304807	chr10	134304801	7.1e-05	Quiescent/Low
rs190121165	chr11	132396	chr11	132411	1e-05	Quiescent/Low
rs73385846	chr11	457636	chr11	457665	0.000611	Active Enhancer
rs112394118	chr11	1893516	chr11	1893506	0.000347	Weak Transcription
rs10833460	chr11	3225964	chr11	3225966	3.3e-05	Repressed PolyComb
rs7113148	chr11	3923740	chr11	3923756	0.000632	Weak Enhancer
rs55929192	chr11	4340395	chr11	4340367	3.4e-05	Quiescent/Low
rs11033444	chr11	4727291	chr11	4727285	0	Repressed PolyComb
rs74488518	chr11	5385329	chr11	5385322	0.000525	Repressed PolyComb
rs6484590	chr11	11011801	chr11	11011783	0.000858	Repressed PolyComb
rs4910265	chr11	11177850	chr11	11177872	2e-05	CTCF Only
Indel	chr11	12297778	chr11	12298059	2.5e-05	Repressed PolyComb
rs2403656	chr11	13193258	chr11	13193260	1.6e-05	Repressed PolyComb
rs1009243	chr11	15955631	chr11	15955627	7.6e-05	Repressed PolyComb
rs1009243	chr11	15955631	chr11	15955640	0.000108	Repressed PolyComb
rs11827240	chr11	17025060	chr11	17025057	0.000334	Quiescent/Low
rs57834688	chr11	18672469	chr11	18672474	0	Flanking Active TSS
rs57834688	chr11	18672469	chr11	18672482	3e-06	Flanking Active TSS
rs57834688	chr11	18672469	chr11	18672490	4.7e-05	Flanking Active TSS
rs12226523	chr11	20565191	chr11	20565201	0.000335	Repressed PolyComb
rs59157407	chr11	20654659	chr11	20654657	0.000869	Quiescent/Low
rs145974145	chr11	23208274	chr11	23208287	3.3e-05	Quiescent/Low
rs74812934	chr11	23924848	chr11	23924846	6.2e-05	Quiescent/Low
Indel	chr11	23937163	chr11	23937170	2.7e-05	Quiescent/Low
rs7127357	chr11	24993142	chr11	24993162	0.000474	Quiescent/Low
rs10767384	chr11	25433588	chr11	25433584	0	Quiescent/Low
rs59997920	chr11	25775356	chr11	25775357	7.9e-05	Quiescent/Low
rs11029156	chr11	26105526	chr11	26105572	0.000471	Quiescent/Low
rs11029161	chr11	26106509	chr11	26106519	0.000161	Active Enhancer
rs7124399	chr11	26749310	chr11	26749291	0.000772	Quiescent/Low
rs75176485	chr11	27669120	chr11	27669133	0.000806	Quiescent/Low
rs6484476	chr11	30174965	chr11	30174963	2.2e-05	Quiescent/Low
rs73476646	chr11	33027062	chr11	33027070	0.000103	Quiescent/Low
rs7941795	chr11	34250099	chr11	34250076	0	Quiescent/Low
rs7125302	chr11	37932724	chr11	37932720	0.000971	Quiescent/Low
rs1605485	chr11	39765445	chr11	39765451	0.00044	Quiescent/Low
rs34465691	chr11	40459389	chr11	40459382	2.2e-05	Quiescent/Low
rs7482592	chr11	42376425	chr11	42376426	0.000422	Quiescent/Low
rs11037267	chr11	43168028	chr11	43168034	0.000681	Active Enhancer
rs11037789	chr11	44017916	chr11	44017900	0.000755	Repressed PolyComb
rs116758002	chr11	44978748	chr11	44978734	0.000516	Repressed PolyComb
rs78447019	chr11	46506915	chr11	46506912	0.000782	Weak Enhancer (Genic)
rs12366208	chr11	48563128	chr11	48563119	0.000343	Quiescent/Low
rs2866865	chr11	49928065	chr11	49928057	0.000186	Quiescent/Low
Indel	chr11	55857361	chr11	55857374	0.000791	Quiescent/Low
rs77362335	chr11	57166845	chr11	57166871	0.000227	Quiescent/Low
rs11229387	chr11	58141118	chr11	58141302	0.00097	Quiescent/Low
rs34288506	chr11	59248250	chr11	59248254	1.4e-05	Quiescent/Low
rs12293140	chr11	60371839	chr11	60371829	0.000327	Repressed PolyComb
rs972355	chr11	61717337	chr11	61717334	0.000645	Quiescent/Low
rs1944044	chr11	62770017	chr11	62770018	5.9e-05	Repressed PolyComb
rs1939757	chr11	62903823	chr11	62903825	0.000672	Repressed PolyComb
rs2507815	chr11	64795772	chr11	64795981	0.000777	Acetylated Active Enhancer
rs801736	chr11	65928430	chr11	65928440	2.4e-05	Quiescent/Low
rs453262	chr11	68046962	chr11	68046957	0.000305	Quiescent/Low
rs59125981	chr11	70849218	chr11	70849213	0.000797	Quiescent/Low
rs9666926	chr11	71308621	chr11	71308637	0.000477	Repressed PolyComb
rs112849170	chr11	71597420	chr11	71597690	0.000126	Quiescent/Low
rs188564721	chr11	71616205	chr11	71616218	9e-06	Weak Transcription
rs193186562	chr11	74809859	chr11	74809846	0.000668	Quiescent/Low
rs606984	chr11	75280478	chr11	75280420	0.000877	Strong Transcription
rs113324283	chr11	76318217	chr11	76318208	0.000675	Bivalent Enhancer
rs679526	chr11	77597794	chr11	77597768	0.000285	Strong Transcription
rs7104077	chr11	77844495	chr11	77844459	0.000494	Strong Transcription
rs1032633	chr11	80606768	chr11	80606713	0.000999	Quiescent/Low
rs1945666	chr11	81325329	chr11	81325353	0.000635	Quiescent/Low
rs17148336	chr11	85400247	chr11	85400234	0.000394	Repressed PolyComb
rs112277557	chr11	86242616	chr11	86242591	7.9e-05	Quiescent/Low
rs72643314	chr11	88472050	chr11	88472071	0.000987	Repressed PolyComb
rs145917905	chr11	92118636	chr11	92118643	0.000337	Quiescent/Low
rs959626	chr11	94743517	chr11	94743524	0.000217	Repressed PolyComb
rs138337281	chr11	94756356	chr11	94756395	0.000985	Repressed PolyComb
rs4334049	chr11	97347088	chr11	97347080	0.000103	Quiescent/Low
rs58687771	chr11	99379475	chr11	99379473	0.000494	Quiescent/Low
rs73577845	chr11	101986986	chr11	101986990	0.000939	Repressed PolyComb
rs112177562	chr11	102158471	chr11	102158483	0.000435	Weak Enhancer
rs116152409	chr11	104055099	chr11	104055084	0.000374	Quiescent/Low
Indel	chr11	106464695	chr11	106464698	0.000344	Quiescent/Low
rs10890925	chr11	108889906	chr11	108889892	0.000181	Repressed PolyComb
rs621893	chr11	110016327	chr11	110016329	8e-06	Weak Transcription
rs11213918	chr11	111341410	chr11	111341407	0.000528	Repressed PolyComb
Indel	chr11	112059195	chr11	112059156	5e-06	Quiescent/Low
rs10750005	chr11	112510645	chr11	112510641	0.000193	Quiescent/Low
rs1613643	chr11	118068521	chr11	118068528	0.00083	Repressed PolyComb
rs115472960	chr11	118844698	chr11	118844699	0.000166	Repressed PolyComb
rs77364151	chr11	118910440	chr11	118910405	0.000632	Repressed PolyComb
rs77364151	chr11	118910440	chr11	118910417	0.000973	Repressed PolyComb
rs2156665	chr11	121625327	chr11	121625502	0.000583	Quiescent/Low
rs11821677	chr11	122743920	chr11	122743914	0.000147	Weak Enhancer
rs11219047	chr11	123048134	chr11	123048144	0.000324	Repressed PolyComb
rs751195	chr11	126328859	chr11	126328861	0.000714	Repressed PolyComb
rs9326285	chr11	126665849	chr11	126665862	0.000106	Repressed PolyComb
rs56229070	chr11	131082765	chr11	131082766	0.00014	Repressed PolyComb
rs1144221	chr11	134164618	chr11	134164616	0.000169	Repressed PolyComb
rs1892984	chr11	134613917	chr11	134613914	0.00071	Quiescent/Low
rs11224052	chr11	134740773	chr11	134740770	0.000141	Quiescent/Low
rs1567300	chr11	134794564	chr11	134794539	0.000213	Quiescent/Low
rs148240181	chr12	93080	chr12	93080	1.2e-05	Quiescent/Low
rs74056428	chr12	813051	chr12	813091	0.000516	Weak Enhancer
rs6489348	chr12	2208215	chr12	2208179	0.000874	Repressed PolyComb
rs562226	chr12	5202697	chr12	5202693	0.000806	Repressed PolyComb
rs671504	chr12	5293974	chr12	5293959	0.000263	Repressed PolyComb
rs11044148	chr12	8382656	chr12	8382653	1e-06	Quiescent/Low
rs144689981	chr12	9697718	chr12	9697710	0.000319	Quiescent/Low
rs7134094	chr12	10024922	chr12	10025104	0.000387	Repressed PolyComb
rs2617149	chr12	10528333	chr12	10528307	0.00014	Weak Enhancer
Indel	chr12	11218795	chr12	11218793	0	Weak Transcription
Indel	chr12	11218795	chr12	11218828	1.1e-05	Weak Transcription
rs10772426	chr12	11393311	chr12	11393461	0.00063	Quiescent/Low
rs6488428	chr12	11700361	chr12	11700343	0.000375	Active Enhancer
rs191206856	chr12	12067906	chr12	12067855	0.000649	Quiescent/Low
Indel	chr12	13177066	chr12	13177272	0.000849	CTCF Only
rs10845815	chr12	13773428	chr12	13773424	1.4e-05	Repressed PolyComb
Indel	chr12	14295145	chr12	14295154	3.4e-05	Quiescent/Low
rs60039581	chr12	15053844	chr12	15053820	0.000153	Quiescent/Low
rs2445380	chr12	15074376	chr12	15074356	0.000104	Weak Enhancer
rs77648621	chr12	15720931	chr12	15720889	0.000578	Quiescent/Low
rs73297739	chr12	15744568	chr12	15744569	7.6e-05	Quiescent/Low
Indel	chr12	21151627	chr12	21151629	0.000204	Quiescent/Low
rs1677100	chr12	21784416	chr12	21784417	0.000286	Weak Transcription
rs1039230	chr12	24190863	chr12	24190880	0.000248	Repressed PolyComb
rs7306697	chr12	24547511	chr12	24547344	0.000583	Repressed PolyComb
Indel	chr12	26843292	chr12	26843296	5e-06	Strong Transcription
rs1825526	chr12	30404634	chr12	30404625	0.000683	Quiescent/Low
rs188521988	chr12	31248874	chr12	31248876	0.000377	Strong Transcription
rs10771859	chr12	31790119	chr12	31790113	0.000973	Acetylated Active Enhancer
rs16921291	chr12	33936678	chr12	33936691	0.000295	Quiescent/Low
rs79116679	chr12	38443441	chr12	38443765	0.000948	Quiescent/Low
rs1486350	chr12	39133757	chr12	39134107	0.000358	Weak Transcription
rs12823801	chr12	40108169	chr12	40108018	0.000125	Quiescent/Low
rs7486587	chr12	43610039	chr12	43610021	0.00019	Repressed PolyComb
rs4768825	chr12	47902750	chr12	47902810	3.7e-05	Quiescent/Low
rs11609399	chr12	48501161	chr12	48501168	1e-06	Acetylated Active Enhancer
rs11609399	chr12	48501161	chr12	48501332	0.000835	Acetylated Active Enhancer
rs2932106	chr12	48670000	chr12	48670016	0.000335	Repressed PolyComb
rs6580703	chr12	49573947	chr12	49573958	0.000243	Quiescent/Low
rs76431198	chr12	53031867	chr12	53031825	0.0002	Repressed PolyComb
rs143174568	chr12	53332693	chr12	53332690	7.9e-05	Quiescent/Low
rs10876408	chr12	53502811	chr12	53502804	7.2e-05	Repressed PolyComb
rs74091680	chr12	57154822	chr12	57154833	6.6e-05	Quiescent/Low
rs10783874	chr12	58534768	chr12	58534763	0.00096	Quiescent/Low
Indel	chr12	59951694	chr12	59951697	7.4e-05	Quiescent/Low
rs11173249	chr12	60336936	chr12	60336934	3.8e-05	Quiescent/Low
rs7967896	chr12	61587235	chr12	61587227	3e-06	Quiescent/Low
rs1982991	chr12	62917631	chr12	62917627	8.9e-05	Weak Transcription
rs10784318	chr12	63281446	chr12	63281443	0.000274	Quiescent/Low
rs10784326	chr12	63455416	chr12	63455412	0.000574	Quiescent/Low
rs6581479	chr12	63645820	chr12	63645840	0.000983	Quiescent/Low
rs7304381	chr12	67042986	chr12	67042978	0.000628	Repressed PolyComb
rs10784603	chr12	67486133	chr12	67486125	0.00033	Quiescent/Low
rs11177479	chr12	69462960	chr12	69462960	0.000202	Quiescent/Low
rs78674406	chr12	72477262	chr12	72477363	0.000442	Quiescent/Low
rs2176207	chr12	73573245	chr12	73573241	7e-06	Quiescent/Low
rs140915601	chr12	76513122	chr12	76513118	0.000471	Quiescent/Low
rs7978166	chr12	76558745	chr12	76558697	0.000877	Repressed PolyComb
rs7968471	chr12	78378845	chr12	78378831	0.000342	Quiescent/Low
rs12302297	chr12	79146043	chr12	79146032	0.000106	Quiescent/Low
rs4129046	chr12	80902220	chr12	80902214	0.000258	Quiescent/Low
rs2929737	chr12	84695951	chr12	84695953	0.000158	Quiescent/Low
rs74791532	chr12	87891460	chr12	87891419	0.00097	Quiescent/Low
rs11609946	chr12	89368544	chr12	89368545	0.000688	Quiescent/Low
rs7969662	chr12	90841731	chr12	90841748	8.7e-05	Quiescent/Low
rs2408559	chr12	91945866	chr12	91945891	0.000385	Quiescent/Low
rs11106476	chr12	92645164	chr12	92645138	0.000177	Quiescent/Low
rs10777820	chr12	97300540	chr12	97300501	0.000884	Flanking Active TSS
rs10777864	chr12	97838685	chr12	97838649	2.3e-05	Repressed PolyComb
rs10777864	chr12	97838685	chr12	97838656	1.8e-05	Repressed PolyComb
rs10777864	chr12	97838685	chr12	97838675	5e-05	Repressed PolyComb
rs11830189	chr12	100839004	chr12	100839008	0.000173	Repressed PolyComb
rs6538971	chr12	101164753	chr12	101164754	0.000125	Quiescent/Low
rs139130913	chr12	102535317	chr12	102535330	0.000587	Strong Transcription
rs7952936	chr12	108526446	chr12	108526449	0.000526	Repressed PolyComb
rs10861970	chr12	109221013	chr12	109221034	0.000509	Active Enhancer
rs150086011	chr12	109364172	chr12	109364230	0.000733	Quiescent/Low
rs36180928	chr12	109424762	chr12	109424762	0.000387	Repressed PolyComb
rs147846991	chr12	109428222	chr12	109428207	0	Quiescent/Low
rs145324558	chr12	114016393	chr12	114016382	0.000706	Repressed PolyComb
rs7137705	chr12	114973065	chr12	114973058	0.00083	Quiescent/Low
rs61933104	chr12	115039364	chr12	115039370	0.000134	Quiescent/Low
rs12322727	chr12	115054497	chr12	115054489	0.000433	Quiescent/Low
rs16947761	chr12	118025671	chr12	118025677	0.000167	CTCF Only
rs10850890	chr12	118160179	chr12	118160187	2.5e-05	Quiescent/Low
rs11837130	chr12	121613435	chr12	121613464	7.4e-05	Active Enhancer
rs36189777	chr12	122528200	chr12	122528199	0.000159	Weak Transcription
rs76850512	chr12	123186596	chr12	123186609	0.000516	Quiescent/Low
rs7953929	chr12	123758235	chr12	123758231	0.000906	Quiescent/Low
rs59111747	chr12	124678018	chr12	124678006	0.000356	Quiescent/Low
rs838945	chr12	125179602	chr12	125179587	0.000223	Quiescent/Low
rs12582867	chr12	125659798	chr12	125659782	0.000975	Repressed PolyComb
rs11058630	chr12	126887133	chr12	126887135	0.000113	Quiescent/Low
Indel	chr12	127781737	chr12	127781761	2.6e-05	Quiescent/Low
Indel	chr12	127781737	chr12	127781773	0.000273	Quiescent/Low
rs75048747	chr12	128530189	chr12	128530186	0.000255	Quiescent/Low
rs10744431	chr12	130233834	chr12	130233835	2.8e-05	Quiescent/Low
rs150453612	chr12	131913372	chr12	131913370	2.6e-05	Repressed PolyComb
rs11246879	chr12	132070174	chr12	132070183	0.000686	Quiescent/Low
rs61934907	chr12	132137875	chr12	132137708	0.000704	Quiescent/Low
rs35667226	chr12	133823619	chr12	133823619	0.000211	Quiescent/Low
rs146053585	chr12	133832256	chr12	133832247	0	Quiescent/Low
rs1808927	chr13	19479620	chr13	19479612	0.000668	Quiescent/Low
rs9508961	chr13	20496529	chr13	20496506	8.4e-05	Weak Enhancer
rs912138	chr13	24660696	chr13	24660678	4e-06	Repressed PolyComb
rs912138	chr13	24660696	chr13	24660709	0.000708	Repressed PolyComb
Indel	chr13	25052393	chr13	25052422	9.4e-05	Strong Transcription
rs73453298	chr13	29017041	chr13	29017016	0.000228	Quiescent/Low
rs627879	chr13	32099925	chr13	32099920	0.000965	Quiescent/Low
rs2146284	chr13	32389332	chr13	32389324	7.5e-05	Quiescent/Low
rs2858123	chr13	33754878	chr13	33754854	0.000755	Weak Enhancer
rs12877045	chr13	35375762	chr13	35375772	0.000458	Quiescent/Low
rs143888767	chr13	35375809	chr13	35375772	1e-05	Quiescent/Low
rs9575921	chr13	36903136	chr13	36903129	0.000367	Weak Transcription
rs9576182	chr13	37681896	chr13	37681893	0.000337	Repressed PolyComb
rs1333367	chr13	38382982	chr13	38383006	0.000129	Quiescent/Low
rs4316625	chr13	38645454	chr13	38645459	0.000733	Quiescent/Low
rs55766452	chr13	38834343	chr13	38834338	0.000513	Quiescent/Low
rs7982877	chr13	39199952	chr13	39199936	0.000334	Quiescent/Low
rs4589419	chr13	39532554	chr13	39532566	0.000939	Quiescent/Low
rs7983763	chr13	40036947	chr13	40036945	0.000286	Repressed PolyComb
rs9548932	chr13	40353230	chr13	40353231	0	Quiescent/Low
rs17061118	chr13	40888819	chr13	40888826	0.000799	Repressed PolyComb
rs1571562	chr13	44887242	chr13	44887281	0.000418	Repressed PolyComb
rs73476795	chr13	46507907	chr13	46507937	7.6e-05	Repressed PolyComb
Indel	chr13	46611804	chr13	46611799	0.000129	Strong Transcription
rs144040102	chr13	48995770	chr13	48995743	0.000228	Quiescent/Low
rs139802223	chr13	51080817	chr13	51080847	0.000223	Repressed PolyComb
rs11619681	chr13	52088867	chr13	52088886	0.000835	Repressed PolyComb
rs9536171	chr13	53164178	chr13	53164205	0.000167	Repressed PolyComb
rs1379829	chr13	54402967	chr13	54402965	0.000291	Quiescent/Low
rs878943	chr13	54697600	chr13	54697897	0.000733	Quiescent/Low
rs9536997	chr13	55761251	chr13	55761257	0.000269	Quiescent/Low
rs56384167	chr13	59818608	chr13	59818611	3.7e-05	Quiescent/Low
rs4886284	chr13	61461057	chr13	61461054	4.1e-05	Quiescent/Low
rs2329317	chr13	62070819	chr13	62070817	0.000251	Quiescent/Low
rs79090876	chr13	63313802	chr13	63313808	0.000608	Quiescent/Low
rs3106429	chr13	63627680	chr13	63627678	0.000103	Quiescent/Low
rs7350650	chr13	64267983	chr13	64268007	0.000411	Quiescent/Low
rs61951364	chr13	64961244	chr13	64961253	1.5e-05	Quiescent/Low
rs9317443	chr13	65345208	chr13	65345206	0.000652	Quiescent/Low
rs116089661	chr13	68036977	chr13	68036995	0.000502	Quiescent/Low
rs74090425	chr13	70300916	chr13	70300914	0.000268	Quiescent/Low
Indel	chr13	75874521	chr13	75874487	0.000927	Acetylated Active Enhancer
rs9600713	chr13	77053395	chr13	77053393	0	Repressed PolyComb
rs9544749	chr13	78782633	chr13	78782638	0.000151	Quiescent/Low
rs1324792	chr13	78853311	chr13	78853312	4e-06	Quiescent/Low
rs12870201	chr13	81458383	chr13	81458407	0.000684	Quiescent/Low
rs113555113	chr13	82800783	chr13	82800772	0.000687	Quiescent/Low
rs2796864	chr13	83814766	chr13	83814763	0.00071	Quiescent/Low
rs7489728	chr13	86925003	chr13	86925011	9e-06	Quiescent/Low
rs7985040	chr13	89648802	chr13	89648803	0.000868	Quiescent/Low
rs74104417	chr13	95210656	chr13	95210645	0.000219	Quiescent/Low
rs592685	chr13	98929530	chr13	98929531	1e-05	Repressed PolyComb
rs9517508	chr13	99606192	chr13	99606117	0.000777	Quiescent/Low
rs9517668	chr13	99923840	chr13	99923789	0.00077	Active Enhancer
rs74113783	chr13	100702199	chr13	100702200	0.000192	Quiescent/Low
rs9517994	chr13	100733601	chr13	100733608	4.1e-05	Quiescent/Low
rs2786946	chr13	101346042	chr13	101346053	0.000722	Repressed PolyComb
rs1537199	chr13	104398508	chr13	104398537	0.00019	Quiescent/Low
rs1360477	chr13	104411705	chr13	104411710	0.000509	Quiescent/Low
rs9582874	chr13	105140250	chr13	105140251	0.0003	Quiescent/Low
rs4402416	chr13	105897251	chr13	105897247	0.00016	Quiescent/Low
rs7330600	chr13	106332428	chr13	106332425	0.000832	Quiescent/Low
rs9586962	chr13	106372957	chr13	106372942	0.000427	Quiescent/Low
rs9519908	chr13	106678994	chr13	106678981	5.9e-05	Quiescent/Low
rs74113746	chr13	107572576	chr13	107572586	0.00087	Quiescent/Low
rs9514804	chr13	108680683	chr13	108680678	0.000208	Quiescent/Low
rs28454944	chr13	108785645	chr13	108785647	0.000411	Quiescent/Low
rs8000390	chr13	111234073	chr13	111234075	0.00015	Weak Enhancer
rs418935	chr13	111309267	chr13	111309280	1e-05	Weak Enhancer (Genic)
Indel	chr13	113702844	chr13	113702848	0.00097	Quiescent/Low
rs755993	chr13	114005813	chr13	114005811	0.000498	Quiescent/Low
rs36149832	chr13	114450486	chr13	114450485	0.000333	Quiescent/Low
rs185324850	chr13	114454055	chr13	114454243	1.2e-05	Quiescent/Low
rs9604498	chr13	114525938	chr13	114525938	4.1e-05	Quiescent/Low
rs113016927	chr13	114620974	chr13	114620973	0.000806	Repressed PolyComb
rs6572202	chr14	20318601	chr14	20318610	0.000994	Quiescent/Low
rs4600393	chr14	20324185	chr14	20324176	2e-05	Quiescent/Low
rs1620324	chr14	20892091	chr14	20892078	0.000587	Quiescent/Low
rs7146870	chr14	22080143	chr14	22080140	0.000585	Quiescent/Low
rs10131866	chr14	22930022	chr14	22930004	0.000832	Active Enhancer
rs7145789	chr14	23645565	chr14	23645562	0.00033	Repressed PolyComb
Indel	chr14	24067014	chr14	24067030	0.000862	Quiescent/Low
rs75594762	chr14	25061827	chr14	25061787	0.000516	Repressed PolyComb
rs75594762	chr14	25061827	chr14	25061797	3.3e-05	Repressed PolyComb
rs116307483	chr14	25997063	chr14	25997061	0.000397	Quiescent/Low
rs10141563	chr14	26911871	chr14	26911845	0.00019	Quiescent/Low
rs9671357	chr14	27231030	chr14	27231028	0.000313	Quiescent/Low
Indel	chr14	30388677	chr14	30388681	0.000549	Quiescent/Low
rs11623277	chr14	32975240	chr14	32975241	7e-06	Quiescent/Low
rs10130559	chr14	33952546	chr14	33952547	0.0003	Repressed PolyComb
rs17408730	chr14	34163802	chr14	34163798	0.000327	Repressed PolyComb
rs2145623	chr14	35839236	chr14	35839258	7e-05	Quiescent/Low
rs116616652	chr14	36552086	chr14	36552084	5.7e-05	Quiescent/Low
rs2415428	chr14	38558553	chr14	38558533	4.7e-05	Quiescent/Low
rs79726010	chr14	38572626	chr14	38572574	0.000832	Quiescent/Low
rs60831817	chr14	40049290	chr14	40049292	0.00043	Quiescent/Low
rs9323002	chr14	40051406	chr14	40051408	0.000229	Weak Enhancer
rs12893193	chr14	40578459	chr14	40578467	0.000965	Quiescent/Low
rs73308025	chr14	41335715	chr14	41335718	0.000367	Quiescent/Low
rs10148273	chr14	43264623	chr14	43264628	0.000566	Quiescent/Low
Indel	chr14	44144487	chr14	44144602	0.000367	Quiescent/Low
rs2416095	chr14	48034860	chr14	48034845	0.000911	Quiescent/Low
rs12882908	chr14	49598774	chr14	49598770	0.000211	Quiescent/Low
rs10151473	chr14	49958398	chr14	49958411	0.000234	Repressed PolyComb
rs9323200	chr14	51432832	chr14	51432830	9.6e-05	Repressed PolyComb
rs754424	chr14	52527188	chr14	52527176	0.000247	Repressed PolyComb
rs141512581	chr14	52634819	chr14	52634778	0.000333	Quiescent/Low
rs1152468	chr14	56768844	chr14	56768848	3.6e-05	Quiescent/Low
rs862138	chr14	57249292	chr14	57249289	0.000504	Repressed PolyComb
rs1190100	chr14	58015648	chr14	58015652	2.2e-05	Weak Enhancer
rs9672051	chr14	59933474	chr14	59933485	0.000729	Weak Transcription
rs55895345	chr14	60044122	chr14	60044105	0.000912	Quiescent/Low
rs10147559	chr14	62588616	chr14	62588609	0.000738	Quiescent/Low
rs57825855	chr14	64330585	chr14	64330587	3e-06	Acetylated Active Enhancer
rs187230109	chr14	68923022	chr14	68922967	0.000825	Quiescent/Low
rs34842688	chr14	69741258	chr14	69741269	0.000182	Repressed PolyComb
rs78660666	chr14	70732027	chr14	70732024	0.000273	Repressed PolyComb
rs10142850	chr14	72286124	chr14	72286121	0.000106	Repressed PolyComb
rs877561	chr14	78337330	chr14	78337327	0.000387	Quiescent/Low
rs7149168	chr14	78434809	chr14	78434812	0.000927	Repressed PolyComb
rs74581131	chr14	79560958	chr14	79560951	2e-06	Quiescent/Low
rs10149385	chr14	79985997	chr14	79985993	0.000721	Quiescent/Low
rs8007050	chr14	80149564	chr14	80149565	0.00029	Quiescent/Low
rs61986615	chr14	81922082	chr14	81922100	0.000438	Bivalent Enhancer
rs8003477	chr14	82358045	chr14	82358029	2.1e-05	Quiescent/Low
rs880733	chr14	83265785	chr14	83265786	2e-05	Quiescent/Low
rs7142486	chr14	84504068	chr14	84504066	0	Quiescent/Low
rs12889127	chr14	87741802	chr14	87741950	0.000999	Quiescent/Low
rs8013829	chr14	88079713	chr14	88079704	0.000295	Quiescent/Low
rs7155354	chr14	89571030	chr14	89571028	0.000162	Repressed PolyComb
rs56365640	chr14	91911212	chr14	91911209	0.000868	Bivalent Enhancer
rs7150007	chr14	92270253	chr14	92270254	8.7e-05	Quiescent/Low
rs8005128	chr14	92677568	chr14	92677582	0.000319	Quiescent/Low
rs10147792	chr14	92955515	chr14	92955509	3.6e-05	Repressed PolyComb
rs56235455	chr14	96225251	chr14	96225253	5.2e-05	Repressed PolyComb
rs77388998	chr14	96426105	chr14	96426089	0.000474	Quiescent/Low
rs10135972	chr14	97854889	chr14	97854873	0.00097	Active Enhancer
rs112459192	chr14	99441785	chr14	99441782	0.000884	Quiescent/Low
rs113317164	chr14	100253079	chr14	100253095	0.000991	Repressed PolyComb
rs74087628	chr14	103695678	chr14	103695729	2.6e-05	Quiescent/Low
rs2403202	chr14	104080042	chr14	104080043	1e-06	CTCF Only
rs7155082	chr14	104751911	chr14	104751935	3e-05	Quiescent/Low
rs7155082	chr14	104751911	chr14	104751940	9.1e-05	Quiescent/Low
rs10145032	chr14	105414810	chr14	105414807	0.000434	Quiescent/Low
rs10151013	chr14	106084215	chr14	106084243	5.2e-05	Quiescent/Low
rs4983486	chr14	106101463	chr14	106101465	0.00018	Repressed PolyComb
rs28533844	chr14	106654405	chr14	106654412	4.2e-05	Repressed PolyComb
rs61994257	chr14	106788223	chr14	106788233	0	Active Enhancer
rs192167726	chr14	106792031	chr14	106792021	0.000243	Quiescent/Low
rs35601062	chr14	107155850	chr14	107155901	4e-06	Active Enhancer
rs34367977	chr14	107155862	chr14	107155901	1e-06	Active Enhancer
rs112459270	chr14	107173155	chr14	107173176	0.00089	Weak Enhancer
rs10129319	chr14	107176239	chr14	107176245	0.000319	Active Enhancer
rs114521041	chr14	107176940	chr14	107176916	0.000333	Acetylated Active Enhancer
Indel	chr15	22394012	chr15	22394009	0.000238	Repressed PolyComb
rs2880037	chr15	22521944	chr15	22521981	0.000127	Quiescent/Low
rs17841100	chr15	23061275	chr15	23061282	1e-06	Strong Transcription
rs147538407	chr15	23128125	chr15	23128102	5.3e-05	Quiescent/Low
rs397530	chr15	23309269	chr15	23309287	0	Strong Transcription
rs34901442	chr15	23829308	chr15	23829317	0.000548	Quiescent/Low
rs3924993	chr15	24821845	chr15	24821860	0.000497	Quiescent/Low
rs12914023	chr15	25047453	chr15	25047472	4.1e-05	Quiescent/Low
rs12591145	chr15	26051590	chr15	26051604	0.000129	Quiescent/Low
rs12908352	chr15	26600929	chr15	26600944	0.000541	Quiescent/Low
rs7173376	chr15	27879515	chr15	27879520	0.000927	Quiescent/Low
rs59061827	chr15	28529460	chr15	28529476	3e-06	Weak Enhancer (Genic)
rs73364761	chr15	29031737	chr15	29031879	0.000509	Repressed PolyComb
rs36158202	chr15	29125311	chr15	29125311	8e-06	Quiescent/Low
rs56312308	chr15	29451079	chr15	29451133	0.000258	Quiescent/Low
rs148293415	chr15	29923231	chr15	29923234	0.000183	Quiescent/Low
rs867025	chr15	30204015	chr15	30204142	2e-06	Quiescent/Low
rs74010609	chr15	31612469	chr15	31612444	5e-06	Weak Enhancer
rs12915988	chr15	31652995	chr15	31652966	0.000182	Acetylated Active Enhancer
rs3087970	chr15	33595935	chr15	33595929	5.9e-05	Repressed PolyComb
rs17236567	chr15	34094750	chr15	34094728	0.000472	Repressed PolyComb
rs3893819	chr15	34722677	chr15	34722657	0.000985	Strong Transcription
rs11634537	chr15	36556121	chr15	36556262	0.000777	Quiescent/Low
rs4591113	chr15	39966590	chr15	39966582	0.000157	Quiescent/Low
rs548091	chr15	40253723	chr15	40253726	0.000622	Strong Transcription
rs1030417	chr15	42216018	chr15	42216004	0.000159	Active Enhancer (Genic)
rs75887411	chr15	42295618	chr15	42295645	2e-06	Quiescent/Low
rs550781	chr15	46943877	chr15	46943879	7.1e-05	Quiescent/Low
rs1377685	chr15	48321069	chr15	48321057	0.000638	Quiescent/Low
rs113239129	chr15	50088500	chr15	50088489	1e-06	Quiescent/Low
rs80212488	chr15	50701822	chr15	50701809	0.000141	Repressed PolyComb
rs4776024	chr15	52530126	chr15	52530122	0	Quiescent/Low
rs68081619	chr15	53323279	chr15	53323284	0.000122	Quiescent/Low
rs2711639	chr15	54172685	chr15	54172697	0.000365	Quiescent/Low
rs1478178	chr15	54250905	chr15	54250887	5.2e-05	Quiescent/Low
rs7165791	chr15	55158935	chr15	55158925	0.000385	Quiescent/Low
rs6493806	chr15	55966445	chr15	55966486	0.000797	Repressed PolyComb
rs12441843	chr15	56214315	chr15	56214307	0.000577	Quiescent/Low
rs8038458	chr15	59582430	chr15	59582461	0.000557	Active Enhancer (Genic)
rs16943672	chr15	61417454	chr15	61417456	0.00026	Repressed PolyComb
rs8032098	chr15	61585040	chr15	61585041	5e-06	Repressed PolyComb
rs16946083	chr15	63196896	chr15	63196901	0.00044	Repressed PolyComb
rs7180203	chr15	64151059	chr15	64151029	0.000165	Weak Enhancer
rs8037081	chr15	64175305	chr15	64175313	0.000348	Active Enhancer
rs12905925	chr15	65164845	chr15	65164822	0.000223	Active Enhancer
rs12905925	chr15	65164845	chr15	65164853	5e-06	Active Enhancer
rs8024304	chr15	66490018	chr15	66490006	0.000168	Repressed PolyComb
rs34307601	chr15	67356222	chr15	67356220	0.000915	Repressed PolyComb
rs34307601	chr15	67356222	chr15	67356484	0.000113	Repressed PolyComb
rs34307601	chr15	67356222	chr15	67356486	1.9e-05	Repressed PolyComb
rs4516178	chr15	69643911	chr15	69643938	0.000637	Repressed PolyComb
rs1875415	chr15	71922208	chr15	71922209	0.000118	Repressed PolyComb
rs58403754	chr15	75290822	chr15	75290819	5.9e-05	Repressed PolyComb
rs7165531	chr15	76054831	chr15	76054829	5.9e-05	Quiescent/Low
rs11634652	chr15	79749447	chr15	79749473	0.000296	Quiescent/Low
rs7170527	chr15	80523227	chr15	80523256	0.000122	Repressed PolyComb
rs3858957	chr15	80583025	chr15	80583260	0.000709	Repressed PolyComb
rs2672086	chr15	81888706	chr15	81888738	0.000565	Quiescent/Low
rs150904678	chr15	82543181	chr15	82543156	0.000202	Strong Transcription
rs4779050	chr15	83368738	chr15	83368743	0.000516	Quiescent/Low
rs115227747	chr15	83899100	chr15	83899262	0.000874	Quiescent/Low
rs191940149	chr15	83899261	chr15	83899262	0	Quiescent/Low
rs149334398	chr15	85085831	chr15	85085818	5e-06	Quiescent/Low
rs7179643	chr15	85361042	chr15	85361043	6.1e-05	Repressed PolyComb
rs12904890	chr15	85648628	chr15	85648639	5.6e-05	Weak Transcription
rs28390969	chr15	86798841	chr15	86798842	5.1e-05	Quiescent/Low
rs2679089	chr15	87960985	chr15	87961006	0.0005	Quiescent/Low
rs111432708	chr15	90747183	chr15	90747155	0.00025	Weak Enhancer (Genic)
rs8039294	chr15	91743859	chr15	91743868	1.1e-05	Repressed PolyComb
rs74028044	chr15	92014817	chr15	92014806	6.2e-05	Bivalent Enhancer
rs8031451	chr15	93655530	chr15	93655620	0.00033	Repressed PolyComb
rs8036200	chr15	94804690	chr15	94804681	0.000242	Quiescent/Low
rs8033720	chr15	96129419	chr15	96129416	0.000141	Quiescent/Low
Indel	chr15	98549187	chr15	98549176	0.000108	Quiescent/Low
rs58841474	chr15	99029862	chr15	99029888	0	Quiescent/Low
rs2663129	chr15	99609016	chr15	99609014	1e-06	Repressed PolyComb
rs79281899	chr15	100436257	chr15	100436352	3.6e-05	Acetylated Active Enhancer
rs79281899	chr15	100436257	chr15	100436404	0.000268	Active Enhancer
rs8025716	chr15	100720061	chr15	100720062	4.5e-05	Repressed PolyComb
Indel	chr15	101505012	chr15	101505016	0.000489	Strong Transcription
rs11853418	chr15	101505026	chr15	101505014	0	Strong Transcription
rs11853418	chr15	101505026	chr15	101505016	0	Strong Transcription
rs28672804	chr15	101992981	chr15	101993016	5.5e-05	Repressed PolyComb
rs2239315	chr16	4126643	chr16	4126665	0.000547	Quiescent/Low
rs1872682	chr16	5576895	chr16	5576911	0.0007	Quiescent/Low
rs4427802	chr16	5590625	chr16	5590627	4.8e-05	Quiescent/Low
rs1436387	chr16	5917383	chr16	5917407	0.000471	Quiescent/Low
Indel	chr16	6134787	chr16	6134796	1.4e-05	Quiescent/Low
rs4516245	chr16	7384503	chr16	7384510	0.000355	Quiescent/Low
rs17144139	chr16	7624056	chr16	7624051	0.000358	Quiescent/Low
rs12149255	chr16	8012459	chr16	8012456	0.000868	Quiescent/Low
rs188871467	chr16	8928935	chr16	8928975	0.000746	Weak Transcription
rs56057592	chr16	8928977	chr16	8928975	1e-06	Weak Transcription
rs2086154	chr16	9042631	chr16	9042602	3.3e-05	Active Enhancer
rs2965905	chr16	9350820	chr16	9350853	4.7e-05	Quiescent/Low
rs9806806	chr16	9916204	chr16	9916205	0.00058	Weak Transcription
rs7194053	chr16	10758198	chr16	10758219	7e-06	Active Enhancer
rs2541516	chr16	10758217	chr16	10758219	7e-06	Active Enhancer
rs11075069	chr16	12508004	chr16	12508017	0.000436	Weak Transcription
rs4781448	chr16	13440276	chr16	13440295	0.000246	Quiescent/Low
Indel	chr16	14971493	chr16	14971490	3.5e-05	Weak Transcription
rs7186348	chr16	16994295	chr16	16994255	0.00077	Repressed PolyComb
rs75855856	chr16	17077158	chr16	17077174	0.000565	Quiescent/Low
rs4997081	chr16	20365234	chr16	20365226	0.000297	Repressed PolyComb
rs62032520	chr16	26548142	chr16	26548138	8.1e-05	Repressed PolyComb
rs4787919	chr16	27109456	chr16	27109474	9.3e-05	Repressed PolyComb
rs1644625	chr16	27853532	chr16	27853533	0.000147	Repressed PolyComb
rs153173	chr16	29239889	chr16	29239895	7e-06	CTCF Only
rs61140497	chr16	31376347	chr16	31376335	0.000649	Active Enhancer
rs8056200	chr16	31471858	chr16	31471876	3e-06	Flanking Active TSS
rs62056034	chr16	32023444	chr16	32023397	0.000155	Quiescent/Low
rs150024	chr16	32859026	chr16	32859009	0.000508	Quiescent/Low
rs183047	chr16	33520904	chr16	33520906	2e-06	Quiescent/Low
rs8046760	chr16	47036253	chr16	47036254	1.4e-05	Quiescent/Low
Indel	chr16	50135827	chr16	50135838	9.7e-05	Active Enhancer (Genic)
rs13334108	chr16	51206781	chr16	51206801	0.000542	Quiescent/Low
rs2030112	chr16	51610335	chr16	51610338	0.000126	Weak Enhancer
rs11863418	chr16	55089527	chr16	55089548	0.000638	Repressed PolyComb
rs7186347	chr16	55411708	chr16	55411803	0.000669	Quiescent/Low
rs16962386	chr16	60670011	chr16	60670167	0.000127	Quiescent/Low
rs2549291	chr16	70149392	chr16	70149574	0.000113	Weak Enhancer
rs185941622	chr16	71013491	chr16	71013491	4.9e-05	Repressed PolyComb
rs76911356	chr16	71103613	chr16	71103751	3.1e-05	Repressed PolyComb
rs8050058	chr16	71981374	chr16	71981323	0.000649	Quiescent/Low
rs8056270	chr16	73499456	chr16	73499445	0.00015	Quiescent/Low
rs2639311	chr16	73757897	chr16	73757916	0.000216	Quiescent/Low
Indel	chr16	75255077	chr16	75255079	0.000377	Quiescent/Low
rs247454	chr16	75519390	chr16	75519234	0.000999	Active Enhancer
rs13330989	chr16	76472395	chr16	76472236	0.0005	Quiescent/Low
rs16946026	chr16	77614645	chr16	77614646	0	Repressed PolyComb
Indel	chr16	77753790	chr16	77753813	0.000324	Quiescent/Low
rs2204895	chr16	78102777	chr16	78102773	1.1e-05	Repressed PolyComb
rs74032403	chr16	78897528	chr16	78897523	0.000787	Quiescent/Low
rs2550690	chr16	79070978	chr16	79070980	0.000377	Repressed PolyComb
rs73574055	chr16	79890106	chr16	79890113	2e-05	Quiescent/Low
rs889519	chr16	80931210	chr16	80931211	0.000365	Quiescent/Low
rs2317116	chr16	81212069	chr16	81212067	0	Repressed PolyComb
rs59091247	chr16	81249578	chr16	81249598	0.000722	Quiescent/Low
rs77146682	chr16	81874243	chr16	81874258	0.000565	Active Enhancer (Genic)
rs9935462	chr16	82367086	chr16	82367084	0	Quiescent/Low
rs73595369	chr16	82605206	chr16	82605436	0.000333	Repressed PolyComb
rs28495382	chr16	82670555	chr16	82670561	0.000142	Repressed PolyComb
rs7195146	chr16	82677257	chr16	82677213	0.000295	Weak Enhancer
rs889654	chr16	84232134	chr16	84232130	0.000223	Repressed PolyComb
rs244833	chr16	84335714	chr16	84335657	0.000516	Quiescent/Low
rs2326270	chr16	84461051	chr16	84461049	1.1e-05	Repressed PolyComb
rs417632	chr16	84522666	chr16	84522865	0.000119	Strong Transcription
rs4782673	chr16	84884072	chr16	84884073	0	Repressed PolyComb
rs2641697	chr16	84885777	chr16	84885779	0.000161	Repressed PolyComb
rs4843463	chr16	85579023	chr16	85579003	0.000828	Repressed PolyComb
rs56341718	chr16	85603253	chr16	85603246	2.2e-05	Acetylated Active Enhancer
rs410639	chr16	85769034	chr16	85769035	0.000855	Active Enhancer
rs12149350	chr16	86554918	chr16	86554915	0	Quiescent/Low
rs77511481	chr16	86619653	chr16	86619638	0.000547	Repressed PolyComb
rs74036697	chr16	86945703	chr16	86945708	0.000864	Quiescent/Low
rs7500273	chr16	87674183	chr16	87674389	0.000203	Quiescent/Low
rs72814389	chr16	87906107	chr16	87906111	7.9e-05	Quiescent/Low
rs11642693	chr16	88009438	chr16	88009414	1.2e-05	Weak Transcription
rs11648703	chr16	88016393	chr16	88016414	0.000385	Strong Transcription
rs8059821	chr16	89675068	chr16	89675029	0.000333	Quiescent/Low
rs35416508	chr17	34401	chr17	34417	0.000796	Repressed PolyComb
Indel	chr17	236436	chr17	236424	5e-05	Bivalent Enhancer
rs12944579	chr17	552475	chr17	552500	0.000244	Weak Transcription
rs12944579	chr17	552475	chr17	552541	0.000327	Weak Transcription
rs7215151	chr17	933149	chr17	933124	0.000335	Weak Transcription
rs8076453	chr17	1235317	chr17	1235285	0.000489	Quiescent/Low
rs57401276	chr17	2256140	chr17	2256134	4.1e-05	Quiescent/Low
rs35787202	chr17	2641040	chr17	2641045	9.1e-05	Quiescent/Low
rs4060718	chr17	3002027	chr17	3002025	0	Quiescent/Low
rs9903671	chr17	3213911	chr17	3213877	0.000171	Quiescent/Low
rs3744679	chr17	3635740	chr17	3635722	0.000594	Weak Enhancer
rs4985688	chr17	5674396	chr17	5674423	0.000458	Repressed PolyComb
rs2043155	chr17	8632036	chr17	8632033	0.000884	Repressed PolyComb
rs9898043	chr17	10920232	chr17	10920254	0.000479	Quiescent/Low
rs12600404	chr17	12575782	chr17	12575786	0.000138	Repressed PolyComb
rs60500717	chr17	12744380	chr17	12744339	0.000464	Weak Enhancer
rs2529900	chr17	13059918	chr17	13059872	0.000874	Quiescent/Low
rs2022248	chr17	14429625	chr17	14429806	9e-06	Quiescent/Low
rs2022246	chr17	14429786	chr17	14429806	4.7e-05	Quiescent/Low
rs2098087	chr17	14937511	chr17	14937494	4.9e-05	Quiescent/Low
rs1380180	chr17	15193199	chr17	15193187	0.000732	Quiescent/Low
rs11078303	chr17	15375042	chr17	15375053	0.000112	Quiescent/Low
rs2875141	chr17	15375066	chr17	15375053	8.7e-05	Quiescent/Low
rs7216896	chr17	17342696	chr17	17342793	0.000119	Quiescent/Low
rs4244593	chr17	17420218	chr17	17420219	1.2e-05	Quiescent/Low
rs9907254	chr17	18399351	chr17	18399362	0.000341	Quiescent/Low
rs113702898	chr17	19793386	chr17	19793373	0.000103	Quiescent/Low
rs3930821	chr17	20697797	chr17	20697798	2.9e-05	Repressed PolyComb
Indel	chr17	21202237	chr17	21202212	2.2e-05	Strong Transcription
Indel	chr17	21208347	chr17	21208340	0.00091	Strong Transcription
Indel	chr17	21215537	chr17	21215567	1e-06	Strong Transcription
Indel	chr17	21215537	chr17	21215761	0.0007	Strong Transcription
Indel	chr17	21217586	chr17	21217596	2.4e-05	Weak Transcription
rs78032274	chr17	21561999	chr17	21562013	9.2e-05	Quiescent/Low
rs76442659	chr17	26765139	chr17	26765143	0.000167	Quiescent/Low
rs617201	chr17	30893135	chr17	30893145	3.5e-05	Active Enhancer
rs67536209	chr17	33795057	chr17	33795063	0.000198	Quiescent/Low
rs1047449	chr17	39550151	chr17	39550152	0.000319	Repressed PolyComb
rs113542835	chr17	41379925	chr17	41379953	0.000547	Strong Transcription
rs9889857	chr17	41437737	chr17	41437707	1e-05	Active TSS
rs9889857	chr17	41437737	chr17	41437752	2e-06	Active TSS
rs9889857	chr17	41437737	chr17	41437761	2.1e-05	Active TSS
rs15359	chr17	41843979	chr17	41843967	0.000177	CTCF Only
rs112644159	chr17	43665343	chr17	43665332	0.000367	Quiescent/Low
rs146355058	chr17	44567886	chr17	44567909	0.000387	Weak Transcription
rs62073974	chr17	45620240	chr17	45620286	0.000722	Strong Transcription
rs9905460	chr17	46156072	chr17	46156085	0.000565	Weak Transcription
rs57434627	chr17	48413028	chr17	48413020	0.000547	Repressed PolyComb
Indel	chr17	48668013	chr17	48667998	3.4e-05	Repressed PolyComb
rs11652818	chr17	48906353	chr17	48906375	0.000223	Acetylated Active Enhancer
rs4322718	chr17	51983821	chr17	51983824	0.000723	Quiescent/Low
rs2526382	chr17	56391719	chr17	56391720	0.000105	Quiescent/Low
rs9896974	chr17	60466146	chr17	60466140	8.1e-05	Repressed PolyComb
Indel	chr17	63041356	chr17	63041368	2.2e-05	Active Enhancer (Genic)
rs9909376	chr17	63448461	chr17	63448450	0.000714	Repressed PolyComb
rs12601478	chr17	63967370	chr17	63967350	0.000657	Quiescent/Low
rs9891234	chr17	64382610	chr17	64382563	0.000679	Quiescent/Low
rs34295172	chr17	66203129	chr17	66203175	0.000168	Active TSS
rs4426406	chr17	66721592	chr17	66721603	0.000806	Repressed PolyComb
rs62087760	chr17	66797447	chr17	66797457	5.9e-05	Quiescent/Low
rs8073266	chr17	68111167	chr17	68111170	0.000166	Repressed PolyComb
rs67947981	chr17	70907872	chr17	70907907	0.000333	Weak Transcription
rs80200357	chr17	70907889	chr17	70907907	6e-06	Weak Transcription
rs6501632	chr17	71415086	chr17	71415095	0.000141	Quiescent/Low
rs6501698	chr17	72170663	chr17	72170664	0.000461	Repressed PolyComb
rs2670833	chr17	72447892	chr17	72447878	0.000208	Repressed PolyComb
rs2670833	chr17	72447892	chr17	72447896	0.000746	Repressed PolyComb
rs16978136	chr17	72597833	chr17	72597831	0.000297	Repressed PolyComb
rs73350568	chr17	73095130	chr17	73095111	0.000851	Quiescent/Low
rs9903178	chr17	74235205	chr17	74235207	0.000315	Flanking Active TSS
rs11649899	chr17	75268915	chr17	75268925	0.000464	Repressed PolyComb
rs11649824	chr17	76138133	chr17	76138300	8e-05	Active Enhancer (Genic)
rs9913006	chr17	78390931	chr17	78390940	0.000159	Quiescent/Low
rs35435780	chr17	79579602	chr17	79579601	0	Strong Transcription
rs2451199	chr17	80648757	chr17	80648754	0.000397	Quiescent/Low
rs11660198	chr18	631348	chr18	631379	0.000471	Repressed PolyComb
rs151294963	chr18	635883	chr18	635885	6e-06	Repressed PolyComb
rs506739	chr18	2856536	chr18	2856561	0.000142	Repressed PolyComb
rs1791370	chr18	3654814	chr18	3654812	6e-06	Repressed PolyComb
rs78810434	chr18	5386040	chr18	5386038	1.8e-05	Quiescent/Low
rs9963889	chr18	5746990	chr18	5746991	2.3e-05	Repressed PolyComb
rs650333	chr18	8450115	chr18	8450112	0.000119	CTCF Only
rs76631726	chr18	8526644	chr18	8526669	0.000395	Repressed PolyComb
rs6505547	chr18	10350283	chr18	10350285	0.000492	Repressed PolyComb
rs1785595	chr18	10609213	chr18	10609198	0.000224	Active Enhancer
rs9789205	chr18	10703685	chr18	10703879	0.000124	Strong Transcription
rs12326914	chr18	10734485	chr18	10734469	0.000325	Strong Transcription
rs7239326	chr18	11665293	chr18	11665290	0.00071	Repressed PolyComb
rs2855649	chr18	11870071	chr18	11870055	0.000843	Repressed PolyComb
rs7407972	chr18	14322577	chr18	14322551	0.000911	Quiescent/Low
rs140377456	chr18	18538771	chr18	18538762	0.000694	Strong Transcription
rs7240320	chr18	19489914	chr18	19489870	0.000999	Quiescent/Low
Indel	chr18	19656001	chr18	19655995	0.000328	Quiescent/Low
rs4800538	chr18	21636246	chr18	21636259	0.00038	Weak Enhancer
rs16941085	chr18	22461045	chr18	22461043	0.000344	Repressed PolyComb
rs11876226	chr18	22653562	chr18	22653566	0.00057	Repressed PolyComb
rs1642221	chr18	23207020	chr18	23207025	0.000694	Quiescent/Low
rs10853674	chr18	25009084	chr18	25009080	0.000288	Quiescent/Low
rs10502590	chr18	29931146	chr18	29931147	0.000123	Repressed PolyComb
rs115578143	chr18	30036273	chr18	30036276	0.000884	Repressed PolyComb
rs6507036	chr18	31030818	chr18	31030806	0.000906	Quiescent/Low
rs527789	chr18	32651796	chr18	32651798	0.000143	Active Enhancer (Genic)
rs1212408	chr18	35951792	chr18	35951766	0.000716	Quiescent/Low
rs62080688	chr18	36048557	chr18	36048593	0.000675	Quiescent/Low
rs10460060	chr18	37996055	chr18	37996053	0.000251	Quiescent/Low
rs1432152	chr18	39430249	chr18	39430245	2e-06	Repressed PolyComb
rs6507623	chr18	43136059	chr18	43136077	1.1e-05	Quiescent/Low
rs115528989	chr18	44145568	chr18	44145566	3e-06	Repressed PolyComb
rs12457548	chr18	45635635	chr18	45635653	0.000153	Repressed PolyComb
rs76955996	chr18	47403485	chr18	47403500	0	Repressed PolyComb
rs147778877	chr18	47573974	chr18	47574023	0.000722	Repressed PolyComb
Indel	chr18	48279143	chr18	48279135	0.000152	Repressed PolyComb
rs9967395	chr18	48895551	chr18	48895543	0.000464	Quiescent/Low
rs1145303	chr18	51656039	chr18	51656052	0.00015	Active Enhancer
rs1851755	chr18	51909494	chr18	51909460	0.000752	Quiescent/Low
rs12953916	chr18	54952027	chr18	54952029	0.000278	Quiescent/Low
Indel	chr18	56191156	chr18	56191203	0.000752	Active Enhancer
rs55664115	chr18	56370954	chr18	56370965	0.000855	Strong Transcription
rs1108391	chr18	57124645	chr18	57124637	0.000167	Repressed PolyComb
rs17780707	chr18	57274934	chr18	57274915	4.5e-05	Repressed PolyComb
rs7241535	chr18	57738602	chr18	57738604	0.000806	Quiescent/Low
rs8084922	chr18	60930521	chr18	60930503	0.0007	Strong Transcription
rs9630857	chr18	61559786	chr18	61559561	0.000999	Quiescent/Low
rs34106531	chr18	62354202	chr18	62354208	0.000828	Quiescent/Low
rs12458708	chr18	63846810	chr18	63847110	0.000526	Quiescent/Low
rs8095213	chr18	64006386	chr18	64006389	0.000426	Quiescent/Low
rs73967482	chr18	65809018	chr18	65809009	9.2e-05	Quiescent/Low
rs12327317	chr18	67191095	chr18	67191087	0.000222	Quiescent/Low
rs1442664	chr18	67207852	chr18	67207848	0.000814	Quiescent/Low
rs35750757	chr18	67263850	chr18	67263848	0.000147	Quiescent/Low
rs7228021	chr18	67284044	chr18	67284045	0.00014	Quiescent/Low
rs62104083	chr18	69348601	chr18	69348598	0.000453	Quiescent/Low
rs9966604	chr18	69969169	chr18	69969167	0.000271	Quiescent/Low
rs72974629	chr18	71293539	chr18	71293530	0.000649	Quiescent/Low
rs41377344	chr18	71579437	chr18	71579433	2.9e-05	Quiescent/Low
rs1113144	chr18	71774786	chr18	71774787	1.4e-05	Quiescent/Low
rs8099280	chr18	73870447	chr18	73870432	0.000182	Repressed PolyComb
rs61642158	chr18	74311350	chr18	74311352	0.000377	Repressed PolyComb
rs621716	chr18	75406785	chr18	75406745	0.000594	Quiescent/Low
rs2654175	chr18	75472058	chr18	75472081	1e-06	Quiescent/Low
rs304926	chr18	77149615	chr18	77149649	3e-05	Repressed PolyComb
rs1660155	chr18	77255952	chr18	77255945	0.000855	Weak Enhancer
rs9951224	chr18	77276856	chr18	77276802	0.00042	Quiescent/Low
rs111278892	chr19	1039323	chr19	1039321	0.000278	Acetylated Active Enhancer (Genic)
rs12461221	chr19	1849967	chr19	1850001	2.2e-05	Quiescent/Low
rs114861037	chr19	2568272	chr19	2568296	0.000516	Quiescent/Low
rs57644100	chr19	3169045	chr19	3169058	0.000113	Active Enhancer
rs348375	chr19	6547251	chr19	6547230	0.000168	Weak Enhancer
rs7246638	chr19	7634534	chr19	7634536	8e-06	Quiescent/Low
rs140062399	chr19	9335929	chr19	9335938	9.1e-05	Quiescent/Low
rs8101235	chr19	9365120	chr19	9365141	0.0007	Quiescent/Low
rs7257385	chr19	9656698	chr19	9656701	0.000732	Quiescent/Low
rs10401137	chr19	10366557	chr19	10366549	0.000393	Strong Transcription
rs8103537	chr19	12547136	chr19	12547166	0.000333	Weak Transcription
rs8105696	chr19	15721997	chr19	15721999	0.000239	Quiescent/Low
rs4807961	chr19	15743403	chr19	15743437	0.000264	Quiescent/Low
Indel	chr19	15916662	chr19	15916655	5.8e-05	Quiescent/Low
rs34226255	chr19	16430447	chr19	16430448	0.000334	Repressed PolyComb
rs188091858	chr19	17481726	chr19	17481737	0.000274	Active Enhancer
rs12984215	chr19	20752615	chr19	20752618	0.000228	Quiescent/Low
rs138670098	chr19	20752812	chr19	20752825	0.000557	Quiescent/Low
rs141729003	chr19	20752815	chr19	20752825	0.000557	Quiescent/Low
rs145484453	chr19	20752816	chr19	20752825	0.000557	Quiescent/Low
rs10425311	chr19	20826976	chr19	20826983	5.9e-05	Weak Transcription
rs8111898	chr19	23875713	chr19	23875681	1.7e-05	Quiescent/Low
rs10413344	chr19	24368960	chr19	24368973	1.6e-05	Quiescent/Low
rs60281413	chr19	28787303	chr19	28787297	0.000435	Quiescent/Low
rs4804929	chr19	30887533	chr19	30887540	2.2e-05	Quiescent/Low
rs113461151	chr19	34744641	chr19	34744677	0.00097	Flanking Active TSS
rs113461151	chr19	34744641	chr19	34744681	0.000733	Flanking Active TSS
Indel	chr19	36330731	chr19	36330739	0.00057	Quiescent/Low
rs10419454	chr19	38914920	chr19	38914916	0.000965	Quiescent/Low
rs12984621	chr19	41732727	chr19	41732720	0.000361	Bivalent TSS
rs10421658	chr19	43316673	chr19	43316709	0.000357	Quiescent/Low
rs184359619	chr19	43481117	chr19	43481091	0.000812	Quiescent/Low
rs184359619	chr19	43481117	chr19	43481112	2e-06	Quiescent/Low
rs2599468	chr19	43934682	chr19	43934655	0.000337	Weak Enhancer
rs12977355	chr19	44960013	chr19	44960003	0.000371	Quiescent/Low
rs11083840	chr19	47119910	chr19	47119878	0.000108	Active Enhancer
rs11083840	chr19	47119910	chr19	47119938	0.000337	Active Enhancer
rs10412802	chr19	47471072	chr19	47471056	0.000183	Weak Transcription
rs10412802	chr19	47471072	chr19	47471084	9.3e-05	Weak Transcription
rs3112441	chr19	47866150	chr19	47866184	0.000295	Strong Transcription
Indel	chr19	47891037	chr19	47891028	0.000206	Quiescent/Low
rs10414328	chr19	48520249	chr19	48520496	0.000565	Repressed PolyComb
rs445429	chr19	48593357	chr19	48593358	1.3e-05	Quiescent/Low
Indel	chr19	48709971	chr19	48709965	0.000332	Strong Transcription
rs112875637	chr19	48750410	chr19	48750417	0.000166	Weak Enhancer (Genic)
rs55869333	chr19	49342145	chr19	49342162	0.000119	Quiescent/Low
rs17272645	chr19	49342366	chr19	49342328	0.000224	Quiescent/Low
Indel	chr19	50553877	chr19	50554018	0.000733	Flanking Active TSS
rs17835129	chr19	52346515	chr19	52346631	0.000831	Quiescent/Low
rs34092966	chr19	53867322	chr19	53867292	3e-05	Quiescent/Low
Indel	chr19	54744799	chr19	54744791	0	Quiescent/Low
rs35534776	chr19	55107308	chr19	55107315	7.5e-05	Repressed PolyComb
rs4806547	chr19	55274111	chr19	55274116	0.000381	Repressed PolyComb
rs62123384	chr19	55373867	chr19	55373884	2.1e-05	Repressed PolyComb
rs1654411	chr19	55525008	chr19	55525040	0.000126	Quiescent/Low
rs180966869	chr19	56270120	chr19	56270150	3.5e-05	Quiescent/Low
rs295347	chr19	58616256	chr19	58616253	0.00019	Quiescent/Low
rs7584619	chr2	389186	chr2	389213	0.000361	Quiescent/Low
rs28626835	chr2	1271110	chr2	1271102	0.00088	Quiescent/Low
rs36190953	chr2	1275552	chr2	1275723	0.000411	Quiescent/Low
rs77788871	chr2	2438253	chr2	2438255	0.000694	Quiescent/Low
rs17017909	chr2	3756059	chr2	3756052	0.000217	Repressed PolyComb
rs7572261	chr2	4294293	chr2	4294300	0.000973	Quiescent/Low
rs12692367	chr2	8763423	chr2	8763438	5.4e-05	Repressed PolyComb
rs62118799	chr2	9513296	chr2	9513321	0.000877	Bivalent Enhancer
rs146852306	chr2	10476295	chr2	10476315	0.0005	Quiescent/Low
rs139676719	chr2	10476314	chr2	10476315	0.000469	Quiescent/Low
rs28623106	chr2	10887667	chr2	10887678	2.3e-05	Weak Enhancer
rs7568397	chr2	11020903	chr2	11020878	0.000353	Repressed PolyComb
rs7568397	chr2	11020903	chr2	11020900	0.000928	Repressed PolyComb
rs13022515	chr2	11021201	chr2	11021170	2.3e-05	Repressed PolyComb
rs10175541	chr2	11533711	chr2	11533716	1e-06	Quiescent/Low
rs62114992	chr2	11993893	chr2	11993898	0.000414	Quiescent/Low
rs6708911	chr2	12054831	chr2	12054820	2.5e-05	Weak Transcription
rs13392324	chr2	13681291	chr2	13681308	0.000167	Quiescent/Low
rs12999021	chr2	13820332	chr2	13820351	0.000202	Quiescent/Low
rs116498582	chr2	13910912	chr2	13910928	0.000733	Weak Enhancer
rs16861892	chr2	14728009	chr2	14728006	0.000268	Quiescent/Low
rs55782340	chr2	15836524	chr2	15836527	3.5e-05	Quiescent/Low
rs145037602	chr2	16344836	chr2	16344835	0.000549	Quiescent/Low
rs4446073	chr2	17061676	chr2	17061650	0.000334	Quiescent/Low
rs7598471	chr2	19742219	chr2	19742227	2.7e-05	Quiescent/Low
rs16986867	chr2	19889533	chr2	19889534	2.5e-05	Repressed PolyComb
rs329760	chr2	22203670	chr2	22203673	0.000101	Quiescent/Low
rs328529	chr2	22310995	chr2	22310993	5.9e-05	Quiescent/Low
rs12712880	chr2	23429856	chr2	23429875	0.000288	Repressed PolyComb
rs2289021	chr2	26362515	chr2	26362526	0.000312	Quiescent/Low
rs828276	chr2	26973024	chr2	26973031	0.000635	Weak Enhancer
rs58979173	chr2	27711157	chr2	27711165	0.000141	Quiescent/Low
rs186927233	chr2	28327783	chr2	28327779	0.000704	Quiescent/Low
rs408813	chr2	32476390	chr2	32476391	0.000255	Quiescent/Low
rs6543680	chr2	33110369	chr2	33110367	3e-05	Quiescent/Low
rs1961268	chr2	34249225	chr2	34249223	0.000579	Quiescent/Low
rs6743441	chr2	34257861	chr2	34257874	2.3e-05	Quiescent/Low
rs57277741	chr2	34499160	chr2	34499153	1.4e-05	Quiescent/Low
rs12712406	chr2	35212511	chr2	35212513	2.2e-05	Quiescent/Low
rs10865114	chr2	36926977	chr2	36927011	3.4e-05	Repressed PolyComb
rs11678799	chr2	36957163	chr2	36957166	0.000273	Repressed PolyComb
rs1430014	chr2	38060583	chr2	38060536	0.000103	Active Enhancer
rs1430015	chr2	38060635	chr2	38060649	0	Acetylated Active Enhancer
rs1430015	chr2	38060635	chr2	38060664	0	Acetylated Active Enhancer
rs1430017	chr2	38060651	chr2	38060649	0	Acetylated Active Enhancer
rs1430017	chr2	38060651	chr2	38060664	0	Acetylated Active Enhancer
rs13005878	chr2	38060887	chr2	38060877	0.000317	Acetylated Active Enhancer
rs885252	chr2	39850633	chr2	39850639	0.000335	Repressed PolyComb
rs9309061	chr2	41055823	chr2	41055830	0.000587	Quiescent/Low
rs12053183	chr2	41311409	chr2	41311407	0.000248	Quiescent/Low
rs58308351	chr2	41739202	chr2	41739194	4.3e-05	Quiescent/Low
rs4358170	chr2	42115904	chr2	42115884	0.000484	Repressed PolyComb
rs6736751	chr2	43125251	chr2	43125252	0	Repressed PolyComb
rs7578429	chr2	45683374	chr2	45683385	9e-06	Weak Transcription
rs72879061	chr2	47455320	chr2	47455313	0.000427	Repressed PolyComb
rs7562215	chr2	48958687	chr2	48958663	0.000562	Repressed PolyComb
rs12463463	chr2	49438172	chr2	49438200	0.000669	Quiescent/Low
rs2882378	chr2	49730020	chr2	49730018	0.000301	Quiescent/Low
rs785279	chr2	53010456	chr2	53010457	0.0003	Quiescent/Low
rs68035797	chr2	53249645	chr2	53249637	0.000258	Quiescent/Low
rs13423911	chr2	53855688	chr2	53855674	0.000477	Quiescent/Low
rs12713289	chr2	55397168	chr2	55397145	0.000906	Quiescent/Low
rs17048255	chr2	56855312	chr2	56855315	3.3e-05	Quiescent/Low
rs114462366	chr2	56913089	chr2	56913084	0.000348	Quiescent/Low
rs6715599	chr2	57060337	chr2	57060331	0.000212	Quiescent/Low
rs11898024	chr2	58262016	chr2	58261995	0.000746	Active Enhancer (Genic)
rs145149543	chr2	58398804	chr2	58398813	7.6e-05	Weak Transcription
rs7572888	chr2	58894449	chr2	58894446	2e-05	Quiescent/Low
rs140749102	chr2	63319148	chr2	63319180	0.000516	Quiescent/Low
rs57744628	chr2	65999198	chr2	65999215	0.000152	Repressed PolyComb
rs13006260	chr2	66089226	chr2	66089228	0.000302	Quiescent/Low
Indel	chr2	68423451	chr2	68423457	2.8e-05	Weak Enhancer (Genic)
rs6749662	chr2	68894182	chr2	68894187	0.000559	Repressed PolyComb
rs11692853	chr2	70297174	chr2	70297171	0.000185	Active Enhancer (Genic)
rs13408905	chr2	70979073	chr2	70979075	5.6e-05	Repressed PolyComb
rs13413440	chr2	71232023	chr2	71232020	0.000284	Quiescent/Low
rs10194900	chr2	72325404	chr2	72325402	0	Repressed PolyComb
rs11126386	chr2	73062631	chr2	73062634	0.000168	Repressed PolyComb
rs55777925	chr2	77726204	chr2	77726212	0.000322	Quiescent/Low
rs2969615	chr2	78818453	chr2	78818425	0.00039	Quiescent/Low
Indel	chr2	79534465	chr2	79534452	1.2e-05	Quiescent/Low
rs6757468	chr2	79611137	chr2	79611141	7.4e-05	Quiescent/Low
rs2685152	chr2	79817728	chr2	79817734	0.000819	Quiescent/Low
rs13028059	chr2	79909091	chr2	79909083	0.000275	Quiescent/Low
rs2861909	chr2	80009547	chr2	80009509	0.000714	Quiescent/Low
rs13013640	chr2	83862467	chr2	83862677	0.000566	Quiescent/Low
rs746269	chr2	83972647	chr2	83972657	0.000215	Quiescent/Low
rs6752815	chr2	85126785	chr2	85126777	0.000902	Active Enhancer
rs192199548	chr2	85569944	chr2	85569941	3e-06	Weak Transcription
rs192550507	chr2	87397197	chr2	87397145	8.7e-05	Quiescent/Low
rs2949989	chr2	90165531	chr2	90165556	6e-06	Quiescent/Low
rs151077787	chr2	90165574	chr2	90165556	7.4e-05	Quiescent/Low
rs2537082	chr2	91845077	chr2	91845097	0.000229	Quiescent/Low
rs4927436	chr2	91920339	chr2	91920393	0.000165	Quiescent/Low
rs62145880	chr2	91936320	chr2	91936137	0.000411	Quiescent/Low
rs62145880	chr2	91936320	chr2	91936312	7.7e-05	Quiescent/Low
rs6719109	chr2	92089431	chr2	92089414	7e-06	Quiescent/Low
rs6719109	chr2	92089431	chr2	92089433	5.5e-05	Quiescent/Low
rs187814390	chr2	96535957	chr2	96536104	0.000583	Weak Transcription
rs10167290	chr2	96536115	chr2	96536104	0	Weak Transcription
rs58753916	chr2	98287572	chr2	98287559	0.000632	Quiescent/Low
rs6542868	chr2	99782848	chr2	99782877	2.7e-05	Strong Transcription
rs67904254	chr2	104644579	chr2	104644577	0.000656	Quiescent/Low
rs1400114	chr2	108304181	chr2	108304187	0.000397	Quiescent/Low
rs4019115	chr2	112611456	chr2	112611450	5.2e-05	Strong Transcription
rs192745240	chr2	114278527	chr2	114278530	0.000112	Quiescent/Low
rs192745240	chr2	114278527	chr2	114278534	0	Quiescent/Low
rs192745240	chr2	114278527	chr2	114278536	0.000284	Quiescent/Low
rs141607834	chr2	115529981	chr2	115529987	0.000128	Quiescent/Low
rs11674650	chr2	116168777	chr2	116168764	0.0007	Quiescent/Low
rs74649799	chr2	117330337	chr2	117330357	0.000353	Quiescent/Low
rs79628308	chr2	118406798	chr2	118406820	0.000101	Quiescent/Low
rs79628308	chr2	118406798	chr2	118406823	0.000101	Quiescent/Low
rs2422426	chr2	119649716	chr2	119649681	0.000923	Quiescent/Low
rs6542598	chr2	121216828	chr2	121216832	0.000289	Repressed PolyComb
rs2713234	chr2	122063533	chr2	122063534	4e-06	Repressed PolyComb
rs76931601	chr2	122083013	chr2	122082998	3e-06	Repressed PolyComb
rs7587881	chr2	122709147	chr2	122709148	0	Repressed PolyComb
rs114065685	chr2	123252471	chr2	123252472	0.000839	Weak Enhancer
rs6751507	chr2	125384673	chr2	125384682	0.000983	Quiescent/Low
rs34673453	chr2	126389986	chr2	126389971	0.000883	Quiescent/Low
rs35411459	chr2	127178657	chr2	127178723	0.000182	Quiescent/Low
rs68160186	chr2	128588734	chr2	128588679	0.00042	Active Enhancer
rs68160186	chr2	128588734	chr2	128588761	0.000295	Active Enhancer
rs841464	chr2	129355283	chr2	129355280	8.7e-05	Repressed PolyComb
rs4332960	chr2	131038482	chr2	131038478	9.8e-05	Repressed PolyComb
rs116835256	chr2	131147517	chr2	131147534	8e-06	Quiescent/Low
rs77096156	chr2	131525038	chr2	131525053	7.9e-05	CTCF Only
rs59541524	chr2	131608648	chr2	131608667	0.000387	Quiescent/Low
rs55852645	chr2	131622601	chr2	131622596	5.1e-05	Quiescent/Low
rs6430441	chr2	131695642	chr2	131695630	0.000692	Repressed PolyComb
rs7607806	chr2	132322726	chr2	132322724	0.000949	Bivalent Enhancer
rs6759069	chr2	133110485	chr2	133110495	8.5e-05	Repressed PolyComb
rs12691816	chr2	133213295	chr2	133213273	0.000392	Quiescent/Low
rs1975220	chr2	133882565	chr2	133882562	0.000319	Quiescent/Low
rs11902203	chr2	136345356	chr2	136345372	4.7e-05	Weak Transcription
rs10197042	chr2	137696820	chr2	137696825	0.000675	Quiescent/Low
rs12104770	chr2	137732182	chr2	137732171	0.000578	Quiescent/Low
rs486661	chr2	141368094	chr2	141368091	0.000883	Quiescent/Low
rs10496874	chr2	142005960	chr2	142005961	1e-05	Quiescent/Low
rs6721469	chr2	142591851	chr2	142591843	0.000342	Quiescent/Low
rs73962316	chr2	143854859	chr2	143854827	0.000128	Quiescent/Low
rs59583116	chr2	149975927	chr2	149975924	0.000901	Quiescent/Low
rs6434098	chr2	153415376	chr2	153415331	6.4e-05	Quiescent/Low
rs16840086	chr2	157026688	chr2	157026690	0.000208	Quiescent/Low
rs140488635	chr2	157632744	chr2	157632768	3.8e-05	Quiescent/Low
rs116598579	chr2	158241951	chr2	158241956	0.000985	Quiescent/Low
rs80206089	chr2	158917129	chr2	158917146	0.000144	Quiescent/Low
rs13393480	chr2	161058790	chr2	161058801	0	Weak Enhancer
rs78960211	chr2	162101505	chr2	162101506	1.3e-05	Active TSS
rs78960211	chr2	162101505	chr2	162101509	1.3e-05	Active TSS
rs78960211	chr2	162101505	chr2	162101512	8e-06	Active TSS
rs78960211	chr2	162101505	chr2	162101525	2e-05	Active TSS
rs78960211	chr2	162101505	chr2	162101532	8.1e-05	Active TSS
rs78960211	chr2	162101505	chr2	162101691	0.0005	Active TSS
rs78960211	chr2	162101505	chr2	162101694	0.0005	Active TSS
rs78960211	chr2	162101505	chr2	162101701	0.000777	Active TSS
rs11899387	chr2	167276958	chr2	167276955	0.00029	Quiescent/Low
rs6432922	chr2	167438479	chr2	167438481	3.3e-05	Quiescent/Low
rs13424012	chr2	169017542	chr2	169017543	1e-06	CTCF Only
rs186543211	chr2	169727075	chr2	169727053	0.000285	Weak Transcription
rs4302191	chr2	170079356	chr2	170079332	0.00019	Quiescent/Low
rs4302191	chr2	170079356	chr2	170079349	0.00012	Quiescent/Low
rs72885433	chr2	171562947	chr2	171562952	3.2e-05	Repressed PolyComb
rs6716769	chr2	174129364	chr2	174129346	0.000701	Acetylated Active Enhancer
rs9646789	chr2	175038023	chr2	175038066	0.000119	Strong Transcription
rs16862739	chr2	175446469	chr2	175446475	8e-06	Weak Enhancer (Genic)
rs6733437	chr2	182205707	chr2	182205721	2e-06	Quiescent/Low
rs9808112	chr2	182655032	chr2	182655013	0.000868	Repressed PolyComb
rs6743243	chr2	188483928	chr2	188483917	0.000119	Quiescent/Low
rs1991629	chr2	195879225	chr2	195879221	0.000812	Quiescent/Low
Indel	chr2	196184683	chr2	196184695	0.000906	Quiescent/Low
rs16826873	chr2	198898222	chr2	198898223	0.000335	Quiescent/Low
Indel	chr2	200099476	chr2	200099474	6.6e-05	Quiescent/Low
rs3116508	chr2	204785385	chr2	204785433	7.4e-05	Repressed PolyComb
rs10932102	chr2	206180052	chr2	206180053	4.7e-05	Repressed PolyComb
rs1558845	chr2	206824407	chr2	206824437	0.00077	Quiescent/Low
rs288067	chr2	210373406	chr2	210373394	2.9e-05	Repressed PolyComb
rs61579019	chr2	211927314	chr2	211927287	0.000862	Quiescent/Low
rs11887047	chr2	212409199	chr2	212409202	0.000531	Quiescent/Low
rs7591736	chr2	212969513	chr2	212969505	0.00027	Quiescent/Low
rs111642655	chr2	213309059	chr2	213309096	0.000877	Quiescent/Low
rs34053836	chr2	213895738	chr2	213895751	0.000684	Weak Enhancer (Genic)
rs4549089	chr2	215380524	chr2	215380530	0.000694	Quiescent/Low
rs4234012	chr2	216099189	chr2	216099172	0.000115	Quiescent/Low
rs62181427	chr2	216409838	chr2	216409856	0.000477	Quiescent/Low
rs114793521	chr2	216796167	chr2	216796168	0.00056	CTCF Only
rs113513632	chr2	217168318	chr2	217168315	0.000675	Repressed PolyComb
rs1991107	chr2	220903603	chr2	220903601	0.000367	Repressed PolyComb
rs1454570	chr2	221170118	chr2	221170124	0.000404	Quiescent/Low
rs1897122	chr2	222198534	chr2	222198543	0.000593	Quiescent/Low
rs12999656	chr2	223870411	chr2	223870633	0.000153	Repressed PolyComb
rs12463852	chr2	223948006	chr2	223948010	0.000854	Repressed PolyComb
rs7567246	chr2	225218239	chr2	225218219	0.000965	Repressed PolyComb
Indel	chr2	228971784	chr2	228971778	0.000619	Quiescent/Low
rs7606280	chr2	231515735	chr2	231515751	6e-06	Acetylated Active Enhancer
rs4973362	chr2	231877952	chr2	231877959	0.000319	Repressed PolyComb
rs6759967	chr2	232494742	chr2	232494739	0.000933	Quiescent/Low
rs147731559	chr2	234055554	chr2	234055622	0.000611	Strong Transcription
rs148377885	chr2	234057851	chr2	234057904	0.000333	Strong Transcription
rs36129046	chr2	234059577	chr2	234059660	1.3e-05	Strong Transcription
rs137945009	chr2	234063593	chr2	234063593	0.000327	Strong Transcription
rs137945009	chr2	234063593	chr2	234063637	0	Strong Transcription
rs145368672	chr2	234064387	chr2	234064321	0.000733	Strong Transcription
rs148827642	chr2	234065760	chr2	234065759	3e-06	Strong Transcription
rs148827642	chr2	234065760	chr2	234065784	0	Strong Transcription
rs148827642	chr2	234065760	chr2	234065947	0.000566	Strong Transcription
rs2248733	chr2	234564737	chr2	234564946	0.000777	Bivalent Enhancer
rs4663546	chr2	236014469	chr2	236014467	1.6e-05	Quiescent/Low
rs13401967	chr2	236033583	chr2	236033588	7.8e-05	Repressed PolyComb
rs13397207	chr2	237623403	chr2	237623404	1.2e-05	Repressed PolyComb
rs10192195	chr2	238024308	chr2	238024281	0.00048	Quiescent/Low
rs148907132	chr2	238437833	chr2	238437830	0.000267	Acetylated Active Enhancer
rs11686156	chr2	238814823	chr2	238814796	4.2e-05	Active Enhancer
rs11686156	chr2	238814823	chr2	238814811	0.000142	Active Enhancer
Indel	chr2	239987812	chr2	239987824	0.000149	CTCF Only
rs7574259	chr2	242630976	chr2	242630964	0	Strong Transcription
rs7274499	chr20	64150	chr20	64138	0.000724	Repressed PolyComb
rs73891926	chr20	291904	chr20	291881	0.000159	Weak Enhancer
rs60821030	chr20	898170	chr20	898176	0.000242	Repressed PolyComb
rs2284373	chr20	1111215	chr20	1111205	0.000111	Strong Transcription
rs6080318	chr20	1712183	chr20	1712153	0.000274	Active Enhancer
rs190345370	chr20	4652278	chr20	4652279	8.1e-05	Quiescent/Low
rs11699324	chr20	4856363	chr20	4856383	5e-05	Weak Enhancer
rs1555163	chr20	6670085	chr20	6670079	0.000171	Quiescent/Low
rs1473708	chr20	7109325	chr20	7109321	7.7e-05	Quiescent/Low
rs1703634	chr20	8409294	chr20	8409290	0.000168	Quiescent/Low
rs6039222	chr20	8646393	chr20	8646377	7e-06	Quiescent/Low
rs6087074	chr20	9914178	chr20	9914175	0.000772	Repressed PolyComb
rs7273090	chr20	12323995	chr20	12323998	0.000397	Quiescent/Low
rs6079481	chr20	14516853	chr20	14516835	0.000814	Quiescent/Low
rs6074909	chr20	15496676	chr20	15496685	5.9e-05	Quiescent/Low
rs79437749	chr20	17876971	chr20	17876967	0.000436	Acetylated Active Enhancer
rs57490537	chr20	23359609	chr20	23359600	0.000206	Strong Transcription
rs59581206	chr20	24029732	chr20	24029723	0.000123	Repressed PolyComb
rs529793	chr20	24204423	chr20	24204430	0.000806	Quiescent/Low
rs6132735	chr20	24418579	chr20	24418572	0.000368	Repressed PolyComb
rs61427951	chr20	25198680	chr20	25198672	9e-06	Weak Transcription
rs4003062	chr20	25926296	chr20	25926310	0.000704	Quiescent/Low
rs75083193	chr20	25966054	chr20	25966058	0.000733	Quiescent/Low
rs147933920	chr20	26062621	chr20	26062638	1.3e-05	Quiescent/Low
rs2950843	chr20	26083258	chr20	26083274	0.000704	Quiescent/Low
rs74947803	chr20	26189886	chr20	26189843	0.000159	Quiescent/Low
rs184904870	chr20	26232245	chr20	26232240	1.5e-05	Quiescent/Low
rs139813923	chr20	26232258	chr20	26232240	0.000462	Quiescent/Low
rs6087263	chr20	29605449	chr20	29605469	4e-06	Quiescent/Low
rs144232187	chr20	29611143	chr20	29611159	0.000695	Flanking Active TSS
rs79941353	chr20	31707962	chr20	31707948	0.000166	Active Enhancer
rs6057778	chr20	31821770	chr20	31821755	8e-06	Repressed PolyComb
Indel	chr20	39918077	chr20	39918090	7.5e-05	Weak Enhancer
rs4812816	chr20	42930872	chr20	42930870	1e-06	Quiescent/Low
rs2206889	chr20	43886487	chr20	43886484	5.7e-05	Repressed PolyComb
rs6094683	chr20	46018349	chr20	46018339	0.000684	Active Enhancer
rs2868805	chr20	46121220	chr20	46121291	0.000728	Active Enhancer
rs913674	chr20	48908292	chr20	48908290	0.000211	Quiescent/Low
rs59762781	chr20	50380362	chr20	50380344	0.00016	Repressed PolyComb
rs6013464	chr20	51055057	chr20	51055054	0.0002	CTCF Only
rs241797	chr20	51358730	chr20	51358731	1.3e-05	Repressed PolyComb
rs2256275	chr20	51474404	chr20	51474409	2.6e-05	Quiescent/Low
rs8119157	chr20	53271022	chr20	53271019	4.4e-05	Quiescent/Low
Indel	chr20	53451514	chr20	53451533	0.000414	Quiescent/Low
rs4811539	chr20	53484363	chr20	53484353	0.000374	Quiescent/Low
rs76750590	chr20	54266917	chr20	54266913	0.000248	Quiescent/Low
rs6127860	chr20	55388756	chr20	55388749	0.000959	Quiescent/Low
rs16981436	chr20	56473826	chr20	56473823	0.000118	Repressed PolyComb
rs11699974	chr20	56690175	chr20	56690177	0.000965	Repressed PolyComb
rs6026379	chr20	57163481	chr20	57163520	0.000337	Repressed PolyComb
rs149769	chr20	57863079	chr20	57863089	0.000605	Quiescent/Low
rs6026863	chr20	57979604	chr20	57979801	0.000103	Repressed PolyComb
rs6100738	chr20	58704796	chr20	58704793	0.000164	Quiescent/Low
rs74629179	chr20	59644232	chr20	59644230	0.000851	Quiescent/Low
rs4809455	chr20	61660781	chr20	61660749	0.000289	Weak Transcription
rs4809456	chr20	61660849	chr20	61660870	0.000125	Weak Transcription
rs910930	chr20	61721100	chr20	61721097	7.4e-05	Quiescent/Low
rs185467187	chr21	9679975	chr21	9679974	0.000632	Quiescent/Low
rs4956658	chr21	9876939	chr21	9876938	2.2e-05	Quiescent/Low
rs74643087	chr21	9924029	chr21	9924042	6.6e-05	Weak Transcription
rs80035564	chr21	9925557	chr21	9925557	0.000897	Quiescent/Low
Indel	chr21	9925967	chr21	9925954	1.9e-05	Quiescent/Low
rs183817899	chr21	9944274	chr21	9944274	2e-06	Quiescent/Low
rs182450138	chr21	9949412	chr21	9949423	0	Quiescent/Low
rs9325318	chr21	11140129	chr21	11140169	0.000816	Quiescent/Low
rs10211961	chr21	14407271	chr21	14407261	0.000931	Quiescent/Low
rs148267468	chr21	15441309	chr21	15441285	0	Weak Transcription
rs1736140	chr21	16809911	chr21	16809808	0.000777	Active Enhancer
rs2823657	chr21	17587380	chr21	17587713	0.000145	Quiescent/Low
rs77380312	chr21	19356520	chr21	19356517	0.000301	Quiescent/Low
rs434913	chr21	20907422	chr21	20907392	0.000557	Quiescent/Low
rs34291800	chr21	22042599	chr21	22042591	0.000375	Quiescent/Low
rs34121745	chr21	22042617	chr21	22042591	0.000516	Quiescent/Low
rs2826772	chr21	22666899	chr21	22666900	3.4e-05	Quiescent/Low
rs1783262	chr21	24831066	chr21	24831063	0.000675	Quiescent/Low
rs11087985	chr21	27338259	chr21	27338219	0.000319	Strong Transcription
rs441305	chr21	27551982	chr21	27551984	0.000541	Quiescent/Low
rs1543775	chr21	27961899	chr21	27961900	0.000137	Quiescent/Low
rs2094864	chr21	29355047	chr21	29355043	0.000627	Quiescent/Low
rs62223713	chr21	30158041	chr21	30158046	0.000199	Quiescent/Low
Indel	chr21	30617222	chr21	30617213	0.000227	Active Enhancer
rs8131976	chr21	32523782	chr21	32523784	0.000954	Quiescent/Low
rs845931	chr21	32719977	chr21	32719979	0.0007	CTCF Only
rs11910742	chr21	36245671	chr21	36245652	0.00019	Strong Transcription
rs1304527	chr21	36537190	chr21	36537178	0.000499	Repressed PolyComb
rs8132974	chr21	38040461	chr21	38040462	0.000221	Repressed PolyComb
rs764887	chr21	42010518	chr21	42010509	0.000227	Quiescent/Low
rs2837821	chr21	42161844	chr21	42161839	5.5e-05	Quiescent/Low
rs11910683	chr21	42690922	chr21	42690920	1e-05	Repressed PolyComb
rs7276395	chr21	43721210	chr21	43721208	9.6e-05	Quiescent/Low
rs55687731	chr21	44110016	chr21	44109998	0.000175	Quiescent/Low
Indel	chr21	44188249	chr21	44188252	0.000484	Repressed PolyComb
rs13051665	chr21	45897624	chr21	45897607	0.000489	Repressed PolyComb
rs9981618	chr21	46104316	chr21	46104314	0.000983	Repressed PolyComb
rs183225682	chr21	46283224	chr21	46283222	0.000494	Strong Transcription
rs13045988	chr21	46391046	chr21	46391055	0.000103	Weak Transcription
rs7276828	chr21	46695039	chr21	46695074	9.3e-05	Strong Transcription
rs113743763	chr21	47573338	chr21	47573343	0.000733	CTCF Only
rs113743763	chr21	47573338	chr21	47573347	0.000733	CTCF Only
rs2839202	chr21	47716312	chr21	47716302	0.000267	Quiescent/Low
rs2839202	chr21	47716312	chr21	47716347	0.000167	Quiescent/Low
rs2839202	chr21	47716312	chr21	47716365	2e-06	Quiescent/Low
rs2839204	chr21	47716547	chr21	47716520	0.000346	Quiescent/Low
rs2839204	chr21	47716547	chr21	47716559	4.6e-05	Quiescent/Low
rs74946955	chr22	17366855	chr22	17366848	0.000231	Quiescent/Low
rs2537961	chr22	17518755	chr22	17518733	0.0007	Active TSS
rs5844319	chr22	18089141	chr22	18089161	0.000112	Strong Transcription
rs62232281	chr22	18876385	chr22	18876426	3e-06	Quiescent/Low
rs187723192	chr22	20708436	chr22	20708409	0.000547	Quiescent/Low
rs389624	chr22	21365744	chr22	21365742	0.000258	Quiescent/Low
rs12159322	chr22	23814848	chr22	23814843	3.5e-05	Repressed PolyComb
rs113121939	chr22	23944763	chr22	23944764	0.000571	Repressed PolyComb
rs1807626	chr22	24018015	chr22	24018013	0	Weak Enhancer
rs7284733	chr22	26667760	chr22	26667736	0.000334	Repressed PolyComb
rs5998442	chr22	32761805	chr22	32761906	0.00083	Quiescent/Low
rs5754556	chr22	33844968	chr22	33844928	0.000637	Quiescent/Low
rs5754876	chr22	34577182	chr22	34577196	3e-06	Quiescent/Low
rs5755252	chr22	35128489	chr22	35128492	0.00027	Quiescent/Low
rs5750112	chr22	35938381	chr22	35938401	0.000814	Repressed PolyComb
rs1012901	chr22	35996676	chr22	35996660	1.3e-05	Repressed PolyComb
rs1012901	chr22	35996676	chr22	35996662	1.3e-05	Repressed PolyComb
rs1012901	chr22	35996676	chr22	35996667	0.000119	Repressed PolyComb
rs73407611	chr22	36829192	chr22	36829224	0.000627	Quiescent/Low
rs5005164	chr22	37642348	chr22	37642356	0.000494	Active Enhancer
rs2284055	chr22	37973676	chr22	37973677	0.000289	Quiescent/Low
rs62228464	chr22	45113754	chr22	45113756	0.000221	Weak Enhancer
rs3859892	chr22	47052693	chr22	47052690	0.000797	Quiescent/Low
rs16996273	chr22	47455695	chr22	47455686	1e-06	Acetylated Active Enhancer
rs747643	chr22	47588106	chr22	47588103	0.000251	Quiescent/Low
rs6007820	chr22	48662337	chr22	48662340	0.000557	Quiescent/Low
rs151089087	chr22	50766523	chr22	50766523	0.000375	Weak Enhancer
rs6010082	chr22	51203174	chr22	51203144	2e-06	Repressed PolyComb
rs2519470	chr22	51223848	chr22	51223869	0.000418	Quiescent/Low
rs6778252	chr3	126158	chr3	126169	0.000228	Quiescent/Low
rs189463144	chr3	1733084	chr3	1733080	0.00089	Quiescent/Low
Indel	chr3	2376253	chr3	2376256	0.000615	Quiescent/Low
rs1904394	chr3	2653221	chr3	2653208	0.000223	Quiescent/Low
rs10865821	chr3	2867502	chr3	2867631	0.000938	Repressed PolyComb
rs6442971	chr3	5699040	chr3	5699078	0.000296	Quiescent/Low
rs715709	chr3	8648021	chr3	8648010	0.000578	Repressed PolyComb
rs6443230	chr3	9365213	chr3	9365206	0.000585	Quiescent/Low
rs148248237	chr3	10190984	chr3	10190986	0.000515	Weak Enhancer (Genic)
rs67569567	chr3	11206038	chr3	11206021	0.000939	Repressed PolyComb
rs12488410	chr3	11245752	chr3	11245742	0.000505	Repressed PolyComb
rs6799179	chr3	12829095	chr3	12829091	0.000973	CTCF Only
rs59742153	chr3	13216278	chr3	13216285	0.000297	Quiescent/Low
rs4450797	chr3	13466697	chr3	13466717	0	Quiescent/Low
rs6764735	chr3	13466723	chr3	13466717	0	Quiescent/Low
rs12497801	chr3	14267730	chr3	14267727	0.00049	Bivalent Enhancer
rs9863389	chr3	14612976	chr3	14612973	0.000649	Repressed PolyComb
rs826424	chr3	15346040	chr3	15346043	0.000328	Strong Transcription
rs826424	chr3	15346040	chr3	15346059	0.000423	Strong Transcription
rs73132531	chr3	15416027	chr3	15416011	1e-06	Weak Enhancer
rs842274	chr3	16327855	chr3	16327811	0.000141	Active Enhancer (Genic)
rs842274	chr3	16327855	chr3	16327892	9.4e-05	Active Enhancer (Genic)
rs2044740	chr3	16771177	chr3	16771151	0.000774	Repressed PolyComb
rs55894954	chr3	17055308	chr3	17055304	1.2e-05	Active Enhancer (Genic)
rs6782072	chr3	18849974	chr3	18850200	0.000134	Quiescent/Low
rs11925477	chr3	19930743	chr3	19931067	0.000556	Quiescent/Low
rs4857937	chr3	20344901	chr3	20344899	3.3e-05	Quiescent/Low
rs58836623	chr3	20984427	chr3	20984434	0.000121	Quiescent/Low
rs479923	chr3	21981999	chr3	21981986	2.1e-05	Quiescent/Low
rs1608618	chr3	22739891	chr3	22739888	7.7e-05	Quiescent/Low
rs9844329	chr3	25336575	chr3	25336576	1.4e-05	Quiescent/Low
rs60107328	chr3	25504657	chr3	25504655	0.000339	Quiescent/Low
rs6419853	chr3	26134762	chr3	26134759	0.000365	Quiescent/Low
rs61213366	chr3	26561593	chr3	26561613	0.000711	Quiescent/Low
rs895996	chr3	29057779	chr3	29057774	0.000965	Repressed PolyComb
rs35345406	chr3	29903917	chr3	29903903	0.000442	Quiescent/Low
rs4955283	chr3	32401240	chr3	32401421	0.000239	Repressed PolyComb
rs72619961	chr3	33888926	chr3	33888902	0.000122	Strong Transcription
rs72619961	chr3	33888926	chr3	33888940	6e-06	Strong Transcription
rs6790217	chr3	37949176	chr3	37949171	0.000351	Weak Enhancer
rs6781889	chr3	38045036	chr3	38045026	0.000117	CTCF Only
rs1417147	chr3	39540727	chr3	39540729	0	Repressed PolyComb
rs664342	chr3	39545476	chr3	39545460	4e-06	Repressed PolyComb
rs6599131	chr3	41030886	chr3	41030890	4e-05	Repressed PolyComb
rs10049274	chr3	41346870	chr3	41346868	0.000411	Quiescent/Low
rs138860559	chr3	42147163	chr3	42147122	0.000733	Strong Transcription
rs3890974	chr3	42726643	chr3	42726640	0.000635	Quiescent/Low
Indel	chr3	44882327	chr3	44882317	1.2e-05	Strong Transcription
rs2673051	chr3	45732409	chr3	45732458	0.000155	Acetylated Active Enhancer
rs6441990	chr3	46484261	chr3	46484250	0	Repressed PolyComb
rs6441996	chr3	46505266	chr3	46505279	0.000594	Repressed PolyComb
rs77843842	chr3	55840767	chr3	55840773	0.000474	Repressed PolyComb
rs724929	chr3	56217454	chr3	56217452	4e-06	Quiescent/Low
rs11130520	chr3	56441119	chr3	56441120	0.000117	Quiescent/Low
rs145779703	chr3	56614392	chr3	56614353	0.000395	Strong Transcription
rs4679497	chr3	59589215	chr3	59589234	5.5e-05	Repressed PolyComb
rs7631068	chr3	60364606	chr3	60364669	4.8e-05	Quiescent/Low
Indel	chr3	61743895	chr3	61743872	0.000341	Repressed PolyComb
rs7648560	chr3	61751127	chr3	61751125	0.000198	Quiescent/Low
rs9817678	chr3	62040546	chr3	62040544	6e-06	Quiescent/Low
rs73843671	chr3	62900065	chr3	62900082	0.000521	Quiescent/Low
rs6785893	chr3	63563758	chr3	63563760	0.000167	Quiescent/Low
rs2372186	chr3	65698246	chr3	65698248	0.000912	Quiescent/Low
rs264083	chr3	65746365	chr3	65746363	4.4e-05	Repressed PolyComb
rs145221971	chr3	66280043	chr3	66280049	0.000285	Weak Enhancer
rs2772449	chr3	67609718	chr3	67609671	0.000341	Active Enhancer (Genic)
rs60672235	chr3	67856912	chr3	67856899	0.000302	Repressed PolyComb
rs9873964	chr3	69142898	chr3	69142890	5.6e-05	Active Enhancer (Genic)
rs11128118	chr3	69225588	chr3	69225600	0.000904	Quiescent/Low
rs1347444	chr3	70764115	chr3	70764117	5.9e-05	Quiescent/Low
rs7648447	chr3	73713892	chr3	73713901	0.000344	Repressed PolyComb
rs7613298	chr3	74552459	chr3	74552443	0.000325	Quiescent/Low
rs11928037	chr3	74616253	chr3	74616254	1.3e-05	Quiescent/Low
rs75209320	chr3	75692207	chr3	75692189	0.000259	CTCF Only
rs75209320	chr3	75692207	chr3	75692201	0.00012	CTCF Only
rs75209320	chr3	75692207	chr3	75692221	1e-06	CTCF Only
rs149545157	chr3	75740350	chr3	75740336	0.00038	Quiescent/Low
rs76073569	chr3	75775288	chr3	75775232	0.000746	Quiescent/Low
rs3009023	chr3	75786628	chr3	75786680	0.000115	Weak Transcription
rs78297221	chr3	75786737	chr3	75786680	3e-06	Weak Transcription
rs78297221	chr3	75786737	chr3	75786753	0.000243	Weak Transcription
rs77377261	chr3	75787702	chr3	75787728	0	Strong Transcription
rs72898723	chr3	75837120	chr3	75837060	2e-06	Quiescent/Low
rs72898723	chr3	75837120	chr3	75837291	6e-06	Quiescent/Low
rs191720285	chr3	75837549	chr3	75837557	2.3e-05	Quiescent/Low
rs191720285	chr3	75837549	chr3	75837565	0.000704	Quiescent/Low
rs183946517	chr3	75837560	chr3	75837557	0.000104	Quiescent/Low
rs183946517	chr3	75837560	chr3	75837565	6.1e-05	Quiescent/Low
rs62266765	chr3	75840152	chr3	75839904	0.000131	Quiescent/Low
rs111463512	chr3	75843174	chr3	75843101	3.1e-05	Quiescent/Low
rs7610215	chr3	75861184	chr3	75861196	0.000436	Quiescent/Low
rs73123233	chr3	75942003	chr3	75942280	0.000733	Quiescent/Low
rs7629775	chr3	77299844	chr3	77299825	0.00048	Quiescent/Low
rs7629776	chr3	77299845	chr3	77299825	0.00048	Quiescent/Low
rs188210743	chr3	77339769	chr3	77339766	0.000585	Quiescent/Low
rs60045555	chr3	77354035	chr3	77354027	0.000787	Quiescent/Low
rs72904884	chr3	77720301	chr3	77720306	0.000819	Quiescent/Low
rs9857473	chr3	78578852	chr3	78578850	0.000778	Quiescent/Low
rs3821595	chr3	78668584	chr3	78668600	0.000117	Quiescent/Low
rs4572785	chr3	84407703	chr3	84407937	0.000912	Quiescent/Low
rs6764381	chr3	84863284	chr3	84863281	1.7e-05	Quiescent/Low
rs73845640	chr3	85806415	chr3	85806416	0.000329	Quiescent/Low
rs9857944	chr3	86254105	chr3	86254126	0.000182	Quiescent/Low
rs11127962	chr3	86899598	chr3	86899591	8.1e-05	Quiescent/Low
rs187940199	chr3	86909891	chr3	86909869	0.000684	Quiescent/Low
rs34180835	chr3	87084803	chr3	87084764	0.000987	Quiescent/Low
rs34180835	chr3	87084803	chr3	87084785	0.000307	Quiescent/Low
rs11719000	chr3	94680488	chr3	94680493	1.2e-05	Quiescent/Low
rs4522786	chr3	95595851	chr3	95595838	0.000484	Quiescent/Low
rs72927022	chr3	97911695	chr3	97911715	7.9e-05	Quiescent/Low
rs59884732	chr3	97968243	chr3	97968358	0.000292	Quiescent/Low
rs661266	chr3	100315158	chr3	100315164	0.000837	Repressed PolyComb
rs4479566	chr3	101121528	chr3	101121559	2.4e-05	Quiescent/Low
rs6809539	chr3	101760118	chr3	101760123	0.000709	Repressed PolyComb
rs6809539	chr3	101760118	chr3	101760128	0.000284	Repressed PolyComb
rs56273954	chr3	101896157	chr3	101896147	0.000182	Repressed PolyComb
rs67733349	chr3	101954722	chr3	101954697	2e-06	CTCF Only
rs12492744	chr3	103302409	chr3	103302638	0	Quiescent/Low
rs7609968	chr3	104786544	chr3	104786845	0.000649	Quiescent/Low
rs72945449	chr3	106296879	chr3	106296881	0.000397	Quiescent/Low
rs115745753	chr3	108294534	chr3	108294544	0	Strong Transcription
rs143287445	chr3	109242033	chr3	109241859	0.000411	Quiescent/Low
rs1282960	chr3	111625687	chr3	111625718	7.2e-05	Repressed PolyComb
rs9917839	chr3	113648016	chr3	113648011	0.00012	Repressed PolyComb
rs58217481	chr3	115015461	chr3	115015474	0.000155	Repressed PolyComb
rs13317565	chr3	115675151	chr3	115675136	0.000113	Repressed PolyComb
rs7632246	chr3	115677750	chr3	115677743	0.000232	Repressed PolyComb
rs12486623	chr3	122008509	chr3	122008507	0.000644	Quiescent/Low
rs61614496	chr3	131080505	chr3	131080503	0.000471	Bivalent TSS
rs6773324	chr3	131117560	chr3	131117561	4e-06	Quiescent/Low
rs2263022	chr3	132004137	chr3	132004154	0.000375	Quiescent/Low
rs150812006	chr3	132352129	chr3	132352094	0.000327	Weak Transcription
rs2197968	chr3	132892976	chr3	132892963	0.000797	Repressed PolyComb
rs1197312	chr3	133125713	chr3	133125739	0.000337	Quiescent/Low
rs9819250	chr3	136795393	chr3	136795384	0.000714	Quiescent/Low
rs11714825	chr3	140086548	chr3	140086545	0.000799	Repressed PolyComb
rs75155932	chr3	140788759	chr3	140788756	0.000167	Repressed PolyComb
rs28542299	chr3	142428415	chr3	142428413	5.6e-05	Repressed PolyComb
rs17650950	chr3	143446436	chr3	143446444	0.000263	Quiescent/Low
rs6787553	chr3	144212538	chr3	144212714	0.000115	Quiescent/Low
Indel	chr3	145605802	chr3	145606151	0.000578	Quiescent/Low
rs28493260	chr3	146501091	chr3	146501077	0.000832	Quiescent/Low
rs2934125	chr3	148503834	chr3	148503830	0.000679	Repressed PolyComb
rs9875097	chr3	149175266	chr3	149175270	0.000781	Repressed PolyComb
rs73000102	chr3	149405018	chr3	149405019	1e-06	Quiescent/Low
rs58039037	chr3	150635797	chr3	150635798	0.000219	Repressed PolyComb
rs13067521	chr3	153686350	chr3	153686355	0.000295	Active Enhancer
rs3846026	chr3	153887014	chr3	153887042	0.000112	Bivalent Enhancer
rs73026654	chr3	155829829	chr3	155829830	0.000638	Repressed PolyComb
rs4679782	chr3	156369009	chr3	156368988	0.000562	Quiescent/Low
rs6776157	chr3	156543482	chr3	156543449	1.1e-05	Flanking Active TSS
rs6776157	chr3	156543482	chr3	156543469	2e-06	Flanking Active TSS
rs6776157	chr3	156543482	chr3	156543471	1e-06	Flanking Active TSS
rs7624420	chr3	158510674	chr3	158510672	0.000453	Quiescent/Low
rs9290033	chr3	158700776	chr3	158700779	0.00073	Quiescent/Low
rs9851467	chr3	161365915	chr3	161365902	6e-06	Quiescent/Low
rs3115054	chr3	163029836	chr3	163029822	0.000761	Quiescent/Low
rs57592690	chr3	166465391	chr3	166465394	3.5e-05	Quiescent/Low
rs78062483	chr3	168197368	chr3	168197366	0.000133	Quiescent/Low
rs1965031	chr3	169250081	chr3	169250087	0.000521	Repressed PolyComb
rs34058457	chr3	169554741	chr3	169554939	0.000999	Active Enhancer
rs7632946	chr3	172667470	chr3	172667472	0.000118	Quiescent/Low
rs16863677	chr3	174444527	chr3	174444539	1.2e-05	Quiescent/Low
rs114860560	chr3	175344588	chr3	175344626	0.000507	Quiescent/Low
rs4425272	chr3	176041383	chr3	176041396	3.2e-05	Quiescent/Low
rs4638982	chr3	176041402	chr3	176041396	0.000248	Quiescent/Low
rs4405929	chr3	176505855	chr3	176505707	0.000624	Quiescent/Low
rs6443396	chr3	176609654	chr3	176609657	0.000665	Quiescent/Low
rs4855095	chr3	178878642	chr3	178878600	0.000337	Quiescent/Low
Indel	chr3	182651275	chr3	182651280	4.2e-05	Weak Transcription
rs12106816	chr3	183018541	chr3	183018530	0.000954	Repressed PolyComb
rs11721174	chr3	184294118	chr3	184294106	7.1e-05	Quiescent/Low
rs7630304	chr3	187491794	chr3	187491756	0.000228	Acetylated Active Enhancer
rs6788197	chr3	187596692	chr3	187596791	1.2e-05	Repressed PolyComb
rs6785979	chr3	188517117	chr3	188517114	8e-06	Repressed PolyComb
rs35842958	chr3	189534282	chr3	189534308	0.000322	Weak Enhancer
rs114081492	chr3	190470343	chr3	190470359	0.00081	Quiescent/Low
rs6772115	chr3	190512666	chr3	190512880	0.000745	Quiescent/Low
rs141565132	chr3	191791302	chr3	191791306	0.000709	Quiescent/Low
rs4687308	chr3	191989294	chr3	191989283	0.000253	Quiescent/Low
rs4312612	chr3	192250098	chr3	192250092	3.7e-05	Quiescent/Low
rs1910437	chr3	192387117	chr3	192387114	0.000709	Repressed PolyComb
rs79738191	chr3	192451933	chr3	192451934	0.000126	Repressed PolyComb
rs12107613	chr3	193607758	chr3	193607761	0.000796	Quiescent/Low
rs138059755	chr3	193720647	chr3	193720658	0.000855	Bivalent TSS
rs12186014	chr3	193916943	chr3	193916911	0.000305	Weak Enhancer
rs9823904	chr3	194071499	chr3	194071498	0.000119	CTCF Only
rs7632356	chr3	194110884	chr3	194110881	0.000824	Repressed PolyComb
rs75539242	chr3	195395334	chr3	195395346	0.000565	Strong Transcription
rs147300456	chr3	195450486	chr3	195450474	0	Quiescent/Low
rs62282782	chr3	195687736	chr3	195687750	6e-06	Weak Transcription
rs182117517	chr3	195718943	chr3	195718934	0.00053	Quiescent/Low
rs57673892	chr3	195733512	chr3	195733478	0.000411	Repressed PolyComb
rs7616433	chr3	196015423	chr3	196015437	0.000714	Flanking Active TSS
rs12504735	chr4	1608161	chr4	1608160	0.000649	Quiescent/Low
rs28525345	chr4	1794553	chr4	1794555	0.000965	Repressed PolyComb
rs76492241	chr4	2558486	chr4	2558518	0.000327	Strong Transcription
rs108850	chr4	3258236	chr4	3258217	0.000446	Weak Transcription
rs9993029	chr4	3473639	chr4	3473647	4.1e-05	Quiescent/Low
rs13149173	chr4	3607302	chr4	3607299	0.000302	Quiescent/Low
rs7698431	chr4	4988438	chr4	4988465	0.000103	Quiescent/Low
rs7697884	chr4	5070657	chr4	5070599	0.000566	Quiescent/Low
rs4429675	chr4	5882033	chr4	5882040	2e-06	Quiescent/Low
rs3857182	chr4	7075827	chr4	7075830	9.5e-05	Quiescent/Low
rs113927430	chr4	8256305	chr4	8256282	0.000129	Quiescent/Low
rs113791942	chr4	8256308	chr4	8256282	0.000387	Quiescent/Low
rs28689793	chr4	8358430	chr4	8358436	0.000211	Quiescent/Low
rs112947152	chr4	8459420	chr4	8459382	0.000205	Strong Transcription
rs112947152	chr4	8459420	chr4	8459434	0.000108	Strong Transcription
rs36128743	chr4	8749915	chr4	8749937	2.3e-05	Quiescent/Low
rs35684314	chr4	8981913	chr4	8981912	0	Quiescent/Low
rs35596233	chr4	9008863	chr4	9008902	3.8e-05	Quiescent/Low
rs146215880	chr4	9040524	chr4	9040547	0	Quiescent/Low
rs150411487	chr4	9061499	chr4	9061499	0.000248	Quiescent/Low
rs35927490	chr4	9080942	chr4	9080941	0.000229	Quiescent/Low
rs34296855	chr4	9094129	chr4	9094152	0.000644	Quiescent/Low
rs1811572	chr4	9117904	chr4	9117904	5.7e-05	Quiescent/Low
rs148807130	chr4	9128290	chr4	9128301	0.000687	Quiescent/Low
rs148262539	chr4	9141158	chr4	9141159	0.000223	Quiescent/Low
rs1904942	chr4	9144778	chr4	9144778	0.000153	Quiescent/Low
rs11723024	chr4	9848849	chr4	9848845	0.000307	Repressed PolyComb
rs10939521	chr4	13878675	chr4	13878681	0.000135	Quiescent/Low
rs28547257	chr4	14152075	chr4	14152058	0.000126	Weak Enhancer
rs28824559	chr4	19623569	chr4	19623561	3.2e-05	Quiescent/Low
rs6816381	chr4	20587256	chr4	20587264	0.000308	Quiescent/Low
rs6837150	chr4	21131658	chr4	21131665	1.2e-05	Quiescent/Low
rs4697255	chr4	21990061	chr4	21990065	0.000325	Quiescent/Low
rs73112132	chr4	22429121	chr4	22429124	8e-06	Quiescent/Low
rs56344126	chr4	22679656	chr4	22679632	0.000912	Quiescent/Low
rs140822520	chr4	25649707	chr4	25649724	1e-06	Repressed PolyComb
rs12651221	chr4	25956449	chr4	25956437	0.000782	Repressed PolyComb
rs7678306	chr4	28166519	chr4	28166521	3.7e-05	Quiescent/Low
rs12505073	chr4	30663132	chr4	30663133	0.000923	Quiescent/Low
rs16885561	chr4	31659303	chr4	31659312	0.000353	Quiescent/Low
rs10011756	chr4	32263144	chr4	32263175	0.000115	Quiescent/Low
rs12501284	chr4	32339632	chr4	32339673	0.000644	Quiescent/Low
Indel	chr4	35602872	chr4	35603097	1.5e-05	Quiescent/Low
rs28398099	chr4	36358442	chr4	36358439	0.000716	Quiescent/Low
rs2376094	chr4	36719286	chr4	36719284	5.6e-05	Quiescent/Low
rs1961214	chr4	37003777	chr4	37003794	0.000261	Quiescent/Low
rs11947491	chr4	37116081	chr4	37116082	0.000212	Quiescent/Low
Indel	chr4	38881344	chr4	38881378	0.000382	Weak Transcription
rs16995405	chr4	39570622	chr4	39570655	0.000221	Acetylated Active Enhancer
rs7675561	chr4	41594374	chr4	41594717	6e-06	Quiescent/Low
rs7684382	chr4	42233751	chr4	42233748	0.000513	Quiescent/Low
rs2575503	chr4	42721114	chr4	42721125	0.0003	Quiescent/Low
rs7662118	chr4	43148599	chr4	43148619	0.00035	Quiescent/Low
rs16856850	chr4	44330486	chr4	44330474	0.000552	Quiescent/Low
rs62306369	chr4	55817385	chr4	55817382	0.000184	Quiescent/Low
rs67593382	chr4	56141820	chr4	56141858	0.000395	Quiescent/Low
rs34048788	chr4	58619719	chr4	58619720	2.2e-05	Quiescent/Low
rs181803147	chr4	59639708	chr4	59639710	0.00062	Quiescent/Low
rs10001482	chr4	60691568	chr4	60691563	1e-05	Quiescent/Low
rs778933	chr4	63258582	chr4	63258583	0.000191	Quiescent/Low
rs7670250	chr4	64504776	chr4	64504773	0	Quiescent/Low
rs73228524	chr4	65138794	chr4	65138795	1e-05	Quiescent/Low
rs1390066	chr4	67809075	chr4	67809090	0.000709	Quiescent/Low
rs893482	chr4	68908309	chr4	68908311	5.9e-05	Quiescent/Low
rs149124690	chr4	70103589	chr4	70103630	8.7e-05	Quiescent/Low
rs80288665	chr4	73138653	chr4	73138642	0.000722	Quiescent/Low
rs76481112	chr4	75348744	chr4	75348766	0.000264	Repressed PolyComb
rs62314942	chr4	75496578	chr4	75496546	0.000746	Quiescent/Low
rs7672875	chr4	76194066	chr4	76194067	0	Quiescent/Low
rs10023237	chr4	76256854	chr4	76256844	4.9e-05	Quiescent/Low
rs4859682	chr4	77410318	chr4	77410304	0.00016	Repressed PolyComb
Indel	chr4	78224094	chr4	78224103	0.000474	Repressed PolyComb
rs188678436	chr4	78810478	chr4	78810492	0.000258	Strong Transcription
rs4472162	chr4	79626160	chr4	79626212	0.000191	Weak Enhancer
rs2867692	chr4	81009331	chr4	81009339	0.000973	Repressed PolyComb
Indel	chr4	82553256	chr4	82553535	6e-06	Weak Enhancer
rs1443764	chr4	82927188	chr4	82927198	0.000415	Quiescent/Low
rs11947454	chr4	84145537	chr4	84145507	0.000297	Bivalent Enhancer
rs2125424	chr4	84588704	chr4	84588728	0.000644	Repressed PolyComb
rs74660162	chr4	84779235	chr4	84779201	0.00053	Quiescent/Low
rs4518238	chr4	84827984	chr4	84827986	7.5e-05	Quiescent/Low
rs7655805	chr4	88245965	chr4	88245966	0.000131	Repressed PolyComb
rs6824602	chr4	88722912	chr4	88722913	0.000542	Quiescent/Low
rs140975921	chr4	90594444	chr4	90594457	8e-06	Repressed PolyComb
rs6824181	chr4	95545821	chr4	95545818	0.000369	Quiescent/Low
rs35501794	chr4	95697648	chr4	95697638	1e-06	Quiescent/Low
rs17022183	chr4	95697675	chr4	95697638	0.000777	Quiescent/Low
rs17023905	chr4	96369814	chr4	96369811	9.6e-05	Quiescent/Low
Indel	chr4	98088438	chr4	98088444	0.000778	Quiescent/Low
rs6532697	chr4	98701145	chr4	98701132	0.000337	Quiescent/Low
rs34459774	chr4	101151759	chr4	101151754	0.000758	Quiescent/Low
rs236776	chr4	103086980	chr4	103086981	0.000296	Quiescent/Low
rs223475	chr4	103693143	chr4	103693163	0.000124	Quiescent/Low
rs4698865	chr4	103868749	chr4	103868799	0.000669	Quiescent/Low
rs13147946	chr4	105918000	chr4	105918011	0.000152	Quiescent/Low
rs4443360	chr4	107340838	chr4	107340846	0	Quiescent/Low
rs7683570	chr4	107952618	chr4	107952619	0.000289	Repressed PolyComb
rs7690724	chr4	108670159	chr4	108670143	0.000139	Repressed PolyComb
rs35832098	chr4	109916280	chr4	109916278	0.00051	Quiescent/Low
rs28542804	chr4	110268476	chr4	110268521	0.000168	Quiescent/Low
Indel	chr4	110360597	chr4	110360548	0.0002	Acetylated Active Enhancer
rs227897	chr4	112842885	chr4	112842883	0.000796	Repressed PolyComb
Indel	chr4	114046374	chr4	114046392	0.000182	Quiescent/Low
rs6825790	chr4	115771450	chr4	115771443	0.000137	Quiescent/Low
rs115656288	chr4	116800834	chr4	116800847	0.00087	Quiescent/Low
rs34312914	chr4	117412009	chr4	117412066	0.00097	Quiescent/Low
rs9995921	chr4	121089766	chr4	121089757	0.00026	Quiescent/Low
rs62325178	chr4	121928248	chr4	121928249	1e-05	Repressed PolyComb
rs4833769	chr4	122672970	chr4	122672971	0.000262	Repressed PolyComb
Indel	chr4	129031093	chr4	129031097	0.000385	Strong Transcription
Indel	chr4	129260487	chr4	129260494	0.000862	Quiescent/Low
rs13141942	chr4	132156761	chr4	132156758	0.000205	Quiescent/Low
rs148326100	chr4	138815864	chr4	138815896	0.000855	Quiescent/Low
rs77021102	chr4	140679829	chr4	140679831	0.000711	Repressed PolyComb
rs2636687	chr4	143116685	chr4	143116697	1e-05	Repressed PolyComb
rs4626148	chr4	144052460	chr4	144052456	0.000348	Quiescent/Low
rs10032963	chr4	144654221	chr4	144654238	0.000271	Quiescent/Low
rs7667201	chr4	150036477	chr4	150036486	0.000662	Quiescent/Low
rs6844714	chr4	153909222	chr4	153909228	7.7e-05	Quiescent/Low
rs3796570	chr4	156699636	chr4	156699637	0.00022	Quiescent/Low
rs1514005	chr4	156879929	chr4	156879926	0.000286	Quiescent/Low
rs6819867	chr4	161780372	chr4	161780385	0.000625	Quiescent/Low
rs6853444	chr4	163046145	chr4	163046146	4e-06	Quiescent/Low
rs195907	chr4	163576309	chr4	163576326	0.000725	Quiescent/Low
rs4434203	chr4	163944471	chr4	163944732	0.000232	Quiescent/Low
rs10034631	chr4	164469804	chr4	164469840	0.000417	CTCF Only
rs67502022	chr4	164519380	chr4	164519353	7e-06	Active Enhancer
Indel	chr4	167203390	chr4	167203385	4.4e-05	Quiescent/Low
rs10008350	chr4	168706638	chr4	168706497	0.000877	Quiescent/Low
rs13124475	chr4	168721503	chr4	168721501	6e-06	Quiescent/Low
rs633472	chr4	169123769	chr4	169123757	0.000736	Quiescent/Low
rs4692606	chr4	171344942	chr4	171344755	0.000229	Quiescent/Low
rs6850242	chr4	175322711	chr4	175322729	9.3e-05	Quiescent/Low
rs10000752	chr4	176769121	chr4	176769113	0.000295	Quiescent/Low
rs922846	chr4	177047679	chr4	177047650	3.8e-05	Quiescent/Low
rs34243232	chr4	177503337	chr4	177503359	0.000816	Quiescent/Low
rs56862880	chr4	178024089	chr4	178024094	0.000884	Quiescent/Low
rs1920966	chr4	178507779	chr4	178507783	0	Quiescent/Low
rs6836102	chr4	180175537	chr4	180175534	0.000134	Quiescent/Low
rs73866339	chr4	180458994	chr4	180458999	0.000411	Quiescent/Low
rs17068316	chr4	180802030	chr4	180802028	0.000119	Quiescent/Low
rs10029319	chr4	184248008	chr4	184248004	0.000911	Quiescent/Low
rs6842085	chr4	184355995	chr4	184355970	1e-06	Bivalent Enhancer
rs6842085	chr4	184355995	chr4	184355972	1e-05	Bivalent Enhancer
Indel	chr4	184619029	chr4	184619033	0.000516	Strong Transcription
rs10005433	chr4	185125620	chr4	185125621	1e-06	Quiescent/Low
rs6839175	chr4	185534725	chr4	185534708	1e-05	Quiescent/Low
rs56106324	chr4	185589901	chr4	185589865	0.000835	Weak Enhancer (Genic)
rs76657287	chr4	186937925	chr4	186937729	0.000999	Repressed PolyComb
rs6830563	chr4	187575484	chr4	187575482	0.000297	Quiescent/Low
rs7697279	chr4	187762315	chr4	187762312	0.000468	Quiescent/Low
rs28654711	chr4	187813832	chr4	187813833	7e-06	Quiescent/Low
rs11933236	chr4	187815056	chr4	187815039	0.000502	Quiescent/Low
rs398205	chr4	187816151	chr4	187816152	0.000357	Quiescent/Low
rs115089809	chr4	188866346	chr4	188866333	0.000733	Quiescent/Low
rs2436794	chr4	190476726	chr4	190476750	1.1e-05	Quiescent/Low
rs5015296	chr4	190484193	chr4	190484014	4.9e-05	Quiescent/Low
rs5015296	chr4	190484193	chr4	190484387	9.5e-05	Quiescent/Low
rs2923317	chr4	190486577	chr4	190486506	7.9e-05	Quiescent/Low
rs5002250	chr4	190491193	chr4	190491234	0.000275	Quiescent/Low
rs4043219	chr4	190499398	chr4	190499224	5.3e-05	Quiescent/Low
rs7673999	chr4	190500594	chr4	190500625	0.000267	Quiescent/Low
rs2443237	chr4	190501034	chr4	190501215	8.1e-05	Quiescent/Low
rs4043205	chr4	190505112	chr4	190505293	0.000223	Quiescent/Low
rs2337864	chr4	190505228	chr4	190505293	2.4e-05	Quiescent/Low
rs2337864	chr4	190505228	chr4	190505335	0.000106	Quiescent/Low
rs2598636	chr4	190514979	chr4	190514966	0.000268	Quiescent/Low
rs2598636	chr4	190514979	chr4	190514975	0.00056	Quiescent/Low
rs2598636	chr4	190514979	chr4	190514981	0	Quiescent/Low
rs2598744	chr4	190517672	chr4	190517508	4e-06	Quiescent/Low
rs2598744	chr4	190517672	chr4	190517516	4.3e-05	Quiescent/Low
rs78888665	chr4	190539434	chr4	190539402	1e-06	Quiescent/Low
rs4999392	chr4	190790448	chr4	190790452	1.9e-05	Quiescent/Low
rs61524236	chr4	190801700	chr4	190801726	4.9e-05	Quiescent/Low
rs7668489	chr4	190869704	chr4	190869732	2e-06	Strong Transcription
rs71587137	chr5	725369	chr5	725365	1.1e-05	Repressed PolyComb
rs10077307	chr5	1228629	chr5	1228631	0.000175	Repressed PolyComb
rs114685439	chr5	1613551	chr5	1613575	0.000295	Weak Transcription
rs114685439	chr5	1613551	chr5	1613585	0.000733	Weak Transcription
rs316576	chr5	2286592	chr5	2286457	0.000644	Quiescent/Low
rs78729623	chr5	2925317	chr5	2925314	0.000733	Quiescent/Low
rs413247	chr5	3210266	chr5	3210220	0.000583	Quiescent/Low
rs35941826	chr5	3719705	chr5	3719702	1.4e-05	Quiescent/Low
rs2134405	chr5	3732907	chr5	3732914	3.2e-05	Quiescent/Low
rs13356214	chr5	3944418	chr5	3944438	0.000347	Quiescent/Low
rs10076918	chr5	4309537	chr5	4309511	0.000354	Quiescent/Low
rs114125883	chr5	6311805	chr5	6311801	0.000182	Quiescent/Low
rs72737072	chr5	10072405	chr5	10072424	0.000313	Quiescent/Low
rs2578616	chr5	10255083	chr5	10255096	0	Weak Enhancer (Genic)
rs73741246	chr5	10301616	chr5	10301618	0	Quiescent/Low
rs35198420	chr5	11723966	chr5	11723964	1.1e-05	Quiescent/Low
rs1446062	chr5	13302322	chr5	13302377	0.000802	Quiescent/Low
rs697566	chr5	14745504	chr5	14745497	0.000467	Active Enhancer
rs6892694	chr5	16335518	chr5	16335519	0.000226	Quiescent/Low
Indel	chr5	17031745	chr5	17031756	2e-06	Quiescent/Low
rs74997878	chr5	18466654	chr5	18466614	0.000334	CTCF Only
rs7703731	chr5	18617122	chr5	18617123	0.000738	Quiescent/Low
rs74538962	chr5	19312209	chr5	19312441	0.000405	Quiescent/Low
rs186180930	chr5	19880479	chr5	19880477	3.6e-05	Quiescent/Low
rs248201	chr5	21123885	chr5	21123916	0.000286	Quiescent/Low
rs248212	chr5	21158138	chr5	21158124	3.9e-05	Quiescent/Low
rs1357003	chr5	23624536	chr5	23624524	0.000219	Quiescent/Low
rs55637589	chr5	24650670	chr5	24650685	0.000987	Quiescent/Low
rs55940047	chr5	26550750	chr5	26550751	0.000162	Quiescent/Low
rs73075685	chr5	27639300	chr5	27639306	0.00017	Quiescent/Low
rs59492565	chr5	27921622	chr5	27921625	0.000996	Quiescent/Low
rs67192830	chr5	28383224	chr5	28383205	0.000401	Quiescent/Low
Indel	chr5	29809299	chr5	29809315	0.000442	Quiescent/Low
rs73064341	chr5	31470785	chr5	31470890	0.000119	Weak Enhancer (Genic)
rs6871538	chr5	32929145	chr5	32929120	0.000203	Quiescent/Low
rs7736643	chr5	34389800	chr5	34389815	0	Quiescent/Low
rs12109280	chr5	38166586	chr5	38166581	0.000547	Quiescent/Low
rs4957497	chr5	39659703	chr5	39659674	0.000921	Repressed PolyComb
rs6892328	chr5	41615809	chr5	41615805	0.000358	Quiescent/Low
rs12521398	chr5	51355458	chr5	51355480	3e-06	Quiescent/Low
Indel	chr5	51629650	chr5	51629656	1e-06	Quiescent/Low
rs16879932	chr5	51886996	chr5	51887003	0.000297	Quiescent/Low
rs350448	chr5	51987523	chr5	51987521	0.000211	Repressed PolyComb
rs830885	chr5	52021779	chr5	52021828	0.000583	Quiescent/Low
rs10045875	chr5	53982725	chr5	53982902	0.000874	Repressed PolyComb
rs6450288	chr5	54352148	chr5	54352107	0.000442	Quiescent/Low
rs7719530	chr5	55610324	chr5	55610482	0.00097	CTCF Only
rs831818	chr5	56358147	chr5	56358151	1.9e-05	Repressed PolyComb
rs7704481	chr5	59473622	chr5	59473623	0.000913	Quiescent/Low
rs989049	chr5	63079045	chr5	63079028	0.000139	Quiescent/Low
rs73109396	chr5	65583591	chr5	65583589	0.000786	Repressed PolyComb
rs27424	chr5	66180835	chr5	66180832	0.000411	Quiescent/Low
rs10071479	chr5	66960797	chr5	66960758	0.000832	Quiescent/Low
rs112703523	chr5	68214832	chr5	68214833	1.8e-05	Quiescent/Low
rs111310322	chr5	70699999	chr5	70700009	0.000908	Repressed PolyComb
rs2254961	chr5	71124709	chr5	71124765	0.000832	Quiescent/Low
rs80140666	chr5	72556963	chr5	72556968	2.8e-05	Repressed PolyComb
rs6893199	chr5	73055820	chr5	73055809	3e-06	Weak Enhancer
rs7728722	chr5	73255123	chr5	73255133	0.000711	Repressed PolyComb
rs13159704	chr5	75293656	chr5	75293662	0.000797	Quiescent/Low
rs2432188	chr5	75948848	chr5	75948846	0.000391	Weak Enhancer
rs2662379	chr5	77014845	chr5	77014840	0.000283	Active Enhancer
rs443792	chr5	79815172	chr5	79815176	3e-06	Quiescent/Low
rs73139909	chr5	83115977	chr5	83115980	0.000909	Quiescent/Low
rs6885372	chr5	84453373	chr5	84453353	0.00058	Quiescent/Low
rs10462332	chr5	86850627	chr5	86850625	4.8e-05	Quiescent/Low
rs7445919	chr5	91455963	chr5	91455988	0.000334	Quiescent/Low
rs4283814	chr5	95619469	chr5	95619425	0.000388	Quiescent/Low
rs143166619	chr5	97106368	chr5	97106369	1e-06	Quiescent/Low
rs34495	chr5	98265807	chr5	98265852	0.000923	Acetylated Active Enhancer (Genic)
rs2845992	chr5	98914033	chr5	98914027	0.000516	Quiescent/Low
rs2400797	chr5	101781177	chr5	101781191	0.000354	Quiescent/Low
rs694481	chr5	102083354	chr5	102083372	0	Weak Enhancer
rs2542079	chr5	103460030	chr5	103460025	0.000115	Quiescent/Low
rs2042324	chr5	106699274	chr5	106699265	0.000155	Weak Enhancer
rs2562525	chr5	106746654	chr5	106746661	0.000652	Quiescent/Low
rs638439	chr5	111019966	chr5	111019992	0	Quiescent/Low
Indel	chr5	111019989	chr5	111019992	0	Quiescent/Low
rs3797737	chr5	111090124	chr5	111090142	0.000871	Weak Enhancer (Genic)
rs144487019	chr5	113438232	chr5	113438249	0.000694	Quiescent/Low
rs2954352	chr5	113453147	chr5	113453191	0.000704	Quiescent/Low
rs257054	chr5	114774576	chr5	114774579	0.000235	Quiescent/Low
rs6896619	chr5	115302066	chr5	115302048	1e-06	Repressed PolyComb
rs116311739	chr5	117964450	chr5	117964451	6e-06	Quiescent/Low
rs73785937	chr5	119793880	chr5	119793871	2.8e-05	Flanking Active TSS
rs7705033	chr5	122774785	chr5	122774795	4.7e-05	Weak Enhancer
rs2925890	chr5	124834672	chr5	124834660	0.000158	Quiescent/Low
rs248106	chr5	126518775	chr5	126518777	0.000385	Quiescent/Low
rs77641498	chr5	127004669	chr5	127004666	0.000915	Repressed PolyComb
rs10074635	chr5	128106470	chr5	128106461	0.000207	Quiescent/Low
rs2431193	chr5	129378523	chr5	129378529	0.00027	Quiescent/Low
rs114432878	chr5	129667228	chr5	129667248	0.000714	Quiescent/Low
rs150596748	chr5	131228601	chr5	131228590	9.1e-05	Quiescent/Low
rs2549004	chr5	131827825	chr5	131827807	0.000341	Active Enhancer
rs2562368	chr5	132824126	chr5	132824142	0.000119	Repressed PolyComb
rs801555	chr5	134993120	chr5	134993244	0.000184	Repressed PolyComb
rs28595855	chr5	135418325	chr5	135418302	0.000565	CTCF Only
rs28595855	chr5	135418325	chr5	135418308	0.000435	CTCF Only
rs4835693	chr5	137950183	chr5	137950167	0.000814	Repressed PolyComb
rs825770	chr5	138115219	chr5	138115217	0.000166	Weak Transcription
rs2531351	chr5	140120154	chr5	140120152	0.000389	Quiescent/Low
rs2005205	chr5	142486185	chr5	142486194	0.000347	CTCF Only
rs8180519	chr5	147001384	chr5	147001386	5.6e-05	Quiescent/Low
rs13162410	chr5	147038335	chr5	147038353	5e-05	Quiescent/Low
rs3797315	chr5	148620224	chr5	148620229	6e-06	Bivalent Enhancer
rs3797315	chr5	148620224	chr5	148620243	4e-06	Bivalent Enhancer
rs3797315	chr5	148620224	chr5	148620253	0.000722	Bivalent Enhancer
rs62380640	chr5	149096041	chr5	149096038	0.000435	Repressed PolyComb
rs192062690	chr5	149168241	chr5	149168202	3.4e-05	Weak Transcription
rs6882400	chr5	150053505	chr5	150053494	0.000157	Quiescent/Low
rs10043121	chr5	150663310	chr5	150663284	0.000945	Quiescent/Low
rs159973	chr5	152732841	chr5	152732849	0.000361	Acetylated Active Enhancer
rs4547913	chr5	155336479	chr5	155336480	0	Quiescent/Low
rs2221439	chr5	155731511	chr5	155731513	4.5e-05	Quiescent/Low
rs73294455	chr5	158033200	chr5	158033203	0.000513	Bivalent Enhancer
rs9637862	chr5	158512864	chr5	158512847	0.000297	Weak Enhancer (Genic)
rs6884129	chr5	159378582	chr5	159378556	0.000714	CTCF Only
rs72805305	chr5	160430250	chr5	160430229	0.000342	Quiescent/Low
rs116658675	chr5	160677808	chr5	160677809	0.000684	Quiescent/Low
rs36095700	chr5	162707576	chr5	162707598	0.000221	Quiescent/Low
rs6556693	chr5	163147092	chr5	163147251	0.000777	Quiescent/Low
rs1816042	chr5	164500004	chr5	164500006	0.000143	Quiescent/Low
rs17070345	chr5	168028946	chr5	168028951	0.000174	Quiescent/Low
rs1422022	chr5	168780966	chr5	168780961	0.000513	Repressed PolyComb
rs11745825	chr5	170343132	chr5	170343163	0.000516	Quiescent/Low
rs189153439	chr5	170343159	chr5	170343163	0.000797	Quiescent/Low
rs245778	chr5	170533730	chr5	170533728	8.5e-05	Quiescent/Low
rs140786702	chr5	171018790	chr5	171018780	0.000968	Repressed PolyComb
rs1641584	chr5	171264267	chr5	171264269	1.9e-05	Quiescent/Low
rs812619	chr5	173212571	chr5	173212525	0.000103	Active Enhancer
rs812619	chr5	173212571	chr5	173212560	1.5e-05	Active Enhancer
rs1864925	chr5	173639103	chr5	173639104	0.000746	Repressed PolyComb
rs56357766	chr5	173970208	chr5	173970215	0.000911	Repressed PolyComb
rs13160463	chr5	175706261	chr5	175706238	0.000733	Quiescent/Low
rs335481	chr5	176989919	chr5	176989933	0.000725	Quiescent/Low
rs144697448	chr5	177480682	chr5	177480653	1.7e-05	Quiescent/Low
rs116586704	chr5	177807683	chr5	177807731	0.000877	Quiescent/Low
rs4544835	chr5	177846617	chr5	177846614	0.000334	Repressed PolyComb
rs11249615	chr5	178617669	chr5	178617686	3.4e-05	Quiescent/Low
rs35544663	chr5	178804270	chr5	178804271	0.000165	Quiescent/Low
rs75049160	chr5	179618515	chr5	179618546	0.000583	Quiescent/Low
rs62406148	chr5	179618578	chr5	179618546	0.000333	Quiescent/Low
rs62390559	chr5	180709669	chr5	180709679	2.2e-05	Quiescent/Low
rs150414277	chr6	856678	chr6	856674	6e-06	Quiescent/Low
rs77571364	chr6	1328696	chr6	1328694	3.6e-05	Repressed PolyComb
rs7776281	chr6	3902500	chr6	3902502	0.000365	Repressed PolyComb
rs9503812	chr6	3917145	chr6	3917121	0	Repressed PolyComb
rs2326366	chr6	3978257	chr6	3978281	0.000236	Bivalent Enhancer
rs9405231	chr6	4346939	chr6	4346941	0.000574	Repressed PolyComb
rs140670048	chr6	4831779	chr6	4831734	0.0007	Weak Transcription
rs140670048	chr6	4831779	chr6	4831744	0.000797	Weak Transcription
rs653512	chr6	5118535	chr6	5118568	0.000649	Quiescent/Low
rs2753222	chr6	5242075	chr6	5242101	1.1e-05	Weak Transcription
rs9405897	chr6	6052055	chr6	6052100	0.000624	Repressed PolyComb
rs9392747	chr6	6104722	chr6	6104860	3e-05	Repressed PolyComb
rs9405991	chr6	6973865	chr6	6973851	0.000884	Quiescent/Low
rs35842503	chr6	9230243	chr6	9230230	3.9e-05	Quiescent/Low
rs4314487	chr6	12667091	chr6	12667060	0.000546	Repressed PolyComb
rs2235259	chr6	15511785	chr6	15511830	0.00097	Strong Transcription
rs2619533	chr6	15568893	chr6	15568912	1.2e-05	Quiescent/Low
rs434905	chr6	16409497	chr6	16409471	0.000308	Weak Enhancer (Genic)
rs4496808	chr6	17067041	chr6	17067032	0	Repressed PolyComb
rs116448456	chr6	22921779	chr6	22921780	3e-06	Quiescent/Low
rs141815833	chr6	26368343	chr6	26368292	0.000117	Weak Transcription
rs2504567	chr6	26662920	chr6	26662913	0.000496	Repressed PolyComb
rs28602207	chr6	26681952	chr6	26681941	5e-06	Repressed PolyComb
rs28602207	chr6	26681952	chr6	26681950	0.000264	Repressed PolyComb
rs12332979	chr6	28141548	chr6	28141567	0.000119	Quiescent/Low
rs143840212	chr6	29068971	chr6	29068985	0.000851	Repressed PolyComb
rs365052	chr6	29648398	chr6	29648381	0.000162	Bivalent TSS
rs114568617	chr6	29768037	chr6	29768039	7.9e-05	Repressed PolyComb
rs113041638	chr6	29837464	chr6	29837505	1e-05	Repressed PolyComb
rs115047112	chr6	30377705	chr6	30377738	0.000358	Repressed PolyComb
rs111826132	chr6	31318468	chr6	31318679	0.000211	Weak Enhancer
rs2442720	chr6	31320277	chr6	31320309	2e-06	Strong Transcription
rs114437054	chr6	31356742	chr6	31356725	9e-06	CTCF Only
rs115483549	chr6	32376019	chr6	32376025	7.7e-05	Repressed PolyComb
rs115483549	chr6	32376019	chr6	32376066	0.0005	Repressed PolyComb
rs115506085	chr6	32443387	chr6	32443433	0.000258	Quiescent/Low
rs72844197	chr6	32523020	chr6	32522982	0.0002	Repressed PolyComb
rs112477334	chr6	32587011	chr6	32586991	9.6e-05	Quiescent/Low
rs114824158	chr6	32663208	chr6	32663259	0.000714	Repressed PolyComb
rs114109635	chr6	32663289	chr6	32663259	3.4e-05	Repressed PolyComb
rs115658321	chr6	32685822	chr6	32685808	0.000945	Repressed PolyComb
rs114618811	chr6	32722019	chr6	32722020	0.000163	Repressed PolyComb
rs115770992	chr6	33035288	chr6	33035284	0	Weak Enhancer (Genic)
rs115770992	chr6	33035288	chr6	33035286	0	Weak Enhancer (Genic)
rs115107243	chr6	33050369	chr6	33050668	4e-06	Weak Enhancer (Genic)
rs6457901	chr6	36331158	chr6	36331132	6.4e-05	Quiescent/Low
rs1405069	chr6	36922684	chr6	36922682	0.000397	Quiescent/Low
rs2025431	chr6	37790385	chr6	37790406	9.2e-05	Acetylated Active Enhancer (Genic)
rs7754249	chr6	39478391	chr6	39478388	0.00044	Repressed PolyComb
rs912820	chr6	40237608	chr6	40237583	0.000221	Repressed PolyComb
rs9349181	chr6	41185605	chr6	41185597	0.000217	Repressed PolyComb
rs6938170	chr6	45544276	chr6	45544277	7.4e-05	Repressed PolyComb
rs3822886	chr6	45905512	chr6	45905524	0.00084	Repressed PolyComb
rs13191618	chr6	46733069	chr6	46733071	0.000604	Quiescent/Low
rs78038976	chr6	47658849	chr6	47658853	2e-05	Quiescent/Low
rs537890	chr6	47767462	chr6	47767460	0.000906	Quiescent/Low
rs2474494	chr6	48669662	chr6	48669676	0.000464	Quiescent/Low
rs6922220	chr6	51519715	chr6	51519713	0.000501	Repressed PolyComb
rs1266902	chr6	51835484	chr6	51835495	9.7e-05	Repressed PolyComb
rs2797425	chr6	54012352	chr6	54012354	0.000278	Quiescent/Low
rs73436556	chr6	54920147	chr6	54920155	2e-06	Quiescent/Low
rs12204310	chr6	55484165	chr6	55484208	0.000117	Quiescent/Low
rs10945299	chr6	63160304	chr6	63160277	0.000129	Quiescent/Low
rs71572559	chr6	66905302	chr6	66905309	7.1e-05	Quiescent/Low
rs2812171	chr6	67188306	chr6	67188304	9e-06	Quiescent/Low
rs9354476	chr6	67503171	chr6	67503167	0.000828	Quiescent/Low
rs6455161	chr6	67584704	chr6	67584664	0.000182	Quiescent/Low
rs6940730	chr6	69238456	chr6	69238441	0.000168	Quiescent/Low
rs2496486	chr6	72873796	chr6	72873798	0.000211	Quiescent/Low
rs7775539	chr6	74469732	chr6	74469735	0.000506	Quiescent/Low
rs12193565	chr6	74793641	chr6	74793647	0.000964	Quiescent/Low
rs2485133	chr6	75337753	chr6	75337828	1e-06	Quiescent/Low
rs1213381	chr6	78227749	chr6	78227747	0.000415	Quiescent/Low
rs2125376	chr6	78316113	chr6	78316123	0.000429	Quiescent/Low
rs6929981	chr6	78382534	chr6	78382546	0.000168	Quiescent/Low
Indel	chr6	81728620	chr6	81728610	1.8e-05	Quiescent/Low
rs1276904	chr6	82417353	chr6	82417357	0.000758	Quiescent/Low
rs9353066	chr6	83041543	chr6	83041552	0.000613	CTCF Only
rs6930708	chr6	83434568	chr6	83434565	1.5e-05	Quiescent/Low
rs12660744	chr6	85324863	chr6	85324876	0.000452	Quiescent/Low
rs59444948	chr6	85619718	chr6	85619740	0.000458	Quiescent/Low
rs7761762	chr6	86205968	chr6	86205997	0.000902	Weak Enhancer
Indel	chr6	86475103	chr6	86475110	3.4e-05	Quiescent/Low
Indel	chr6	88209477	chr6	88209487	0.000295	Weak Transcription
rs1923078	chr6	91354077	chr6	91354371	0.000212	Repressed PolyComb
rs1220444	chr6	91655762	chr6	91655776	0.000365	Quiescent/Low
rs4112305	chr6	92321000	chr6	92321344	0.000219	Quiescent/Low
rs58509803	chr6	92352187	chr6	92352215	0.000237	Quiescent/Low
rs9363194	chr6	95093849	chr6	95093850	0	Quiescent/Low
rs73759757	chr6	95445738	chr6	95445728	0.000375	Quiescent/Low
rs73496139	chr6	98209921	chr6	98209944	0.000806	Quiescent/Low
rs6934106	chr6	99758080	chr6	99758072	0.000904	Repressed PolyComb
rs9376645	chr6	100441153	chr6	100441297	0.000583	Repressed PolyComb
rs74936118	chr6	100676462	chr6	100676447	0.000928	Flanking Active TSS
rs846789	chr6	101353588	chr6	101353590	1.5e-05	Repressed PolyComb
rs2579924	chr6	101879846	chr6	101879844	3.8e-05	Quiescent/Low
Indel	chr6	103465291	chr6	103465333	0.000208	Quiescent/Low
rs2010314	chr6	112422664	chr6	112422665	0.000617	Repressed PolyComb
rs1761865	chr6	117266160	chr6	117266161	0.000945	Repressed PolyComb
rs6903067	chr6	117497719	chr6	117497706	0.000277	Repressed PolyComb
rs2788998	chr6	118225209	chr6	118225211	0.000774	Repressed PolyComb
rs1110085	chr6	119153206	chr6	119153206	3.2e-05	Quiescent/Low
rs10484967	chr6	120395440	chr6	120395449	0.000825	Quiescent/Low
rs12198551	chr6	122678383	chr6	122678373	9.8e-05	Repressed PolyComb
rs6920019	chr6	123109423	chr6	123109420	3.8e-05	Repressed PolyComb
rs12333101	chr6	124043731	chr6	124043723	0.000939	Quiescent/Low
rs73567612	chr6	124439450	chr6	124439437	0.00057	Quiescent/Low
rs802245	chr6	124534245	chr6	124534241	0.000415	Quiescent/Low
rs484411	chr6	125441790	chr6	125441781	4.6e-05	Quiescent/Low
rs192645208	chr6	127256059	chr6	127256067	0.000938	Quiescent/Low
rs9767314	chr6	128128374	chr6	128128366	0.000429	Quiescent/Low
rs17055854	chr6	128745590	chr6	128745595	0.00012	Quiescent/Low
rs9388692	chr6	129547880	chr6	129547882	0.000714	Repressed PolyComb
rs7763005	chr6	129843403	chr6	129843396	0.00085	Quiescent/Low
rs4895440	chr6	135426558	chr6	135426543	0.00054	Active Enhancer
Indel	chr6	136599393	chr6	136599171	0.000999	Strong Transcription
Indel	chr6	136599822	chr6	136599813	2.7e-05	Strong Transcription
rs11969177	chr6	136737345	chr6	136737348	0.000132	Repressed PolyComb
rs6916292	chr6	139670677	chr6	139670673	0.000565	Quiescent/Low
rs9373322	chr6	142025178	chr6	142025173	0.000579	Quiescent/Low
rs225626	chr6	142472294	chr6	142472248	0.000877	Strong Transcription
rs9386116	chr6	145706054	chr6	145706048	0.000594	Quiescent/Low
rs640544	chr6	145864021	chr6	145864019	0.000364	Quiescent/Low
rs2181942	chr6	147248136	chr6	147248128	0.000115	Quiescent/Low
rs7739174	chr6	148311410	chr6	148311398	0.000162	Quiescent/Low
rs6934908	chr6	148941922	chr6	148941913	2e-05	Bivalent Enhancer
rs17079169	chr6	149187499	chr6	149187522	0.000832	Bivalent Enhancer
rs7774671	chr6	150868752	chr6	150868753	0.000173	Repressed PolyComb
[truncated: 381 more rows]
