# Supplementary material for: A pooling-based approach to mapping genetic variants associated with DNA methylation
Source: HighWire-hosted journal article supplement (doi:10.1101/gr.183749.114), 2015-04-24
Supplement: PyrosequencingData.zip [file Assay 6-7_kids_pyrograms.doc]

Assay Name: CpG Assay B S1

Sample ID:

Note:

Assay Name: CpG Assay B S1

Sample ID:

Note:

Assay Name: CpG Assay B S1

Sample ID:

Note:

Assay Name: CpG Assay B S1

Sample ID:

Note:

Assay Name: CpG Assay B S1

Sample ID:

Note:

Assay Name: CpG Assay B S1

Sample ID:

Note:

Assay Name: CpG Assay B S1

Sample ID:

Note:

Assay Name: CpG Assay B S1

Sample ID:

Note:

Assay Name: CpG Assay B S1

Sample ID:

Note:

Assay Name: CpG Assay B S1

Sample ID:

Note:

Assay Name: CpG Assay B S1

Sample ID:

Note:

Assay Name: CpG Assay B S1

Sample ID:

Note:

Assay Name: CpG Assay B S1

Sample ID:

Note:

Assay Name: CpG Assay B S1

Sample ID:

Note:

Assay Name: CpG Assay B S1

Sample ID:

Note:

Assay Name: CpG Assay B S1

Sample ID:

Note:

Assay Name: CpG Assay B S1

Sample ID:

Note:

Assay Name: CpG Assay B S1

Sample ID:

Note:

Assay Name: CpG Assay B S1

Sample ID:

Note:

Assay Name: CpG Assay B S1

Sample ID:

Note:

Assay Name: CpG Assay B S1

Sample ID:

Note:

Assay Name: CpG Assay B S1

Sample ID:

Note:

Assay Name: CpG Assay B S1

Sample ID:

Note:

Assay Name: CpG Assay B S1

Sample ID:

Note:

Assay Name: CpG Assay B S1

Sample ID:

Note:

Assay Name: CpG Assay B S1

Sample ID:

Note:

Assay Name: CpG Assay B S1

Sample ID:

Note:

Assay Name: CpG Assay B S1

Sample ID:

Note:

Assay Name: CpG Assay B S1

Sample ID:

Note:

Assay Name: CpG Assay B S1

Sample ID:

Note:

Assay Name: CpG Assay B S1

Sample ID:

Note:

Assay Name: CpG Assay B S1

Sample ID:

Note:

Assay Name: CpG Assay D S1

Sample ID:

Note:

Assay Name: CpG Assay D S1

Sample ID:

Note:

Assay Name: CpG Assay D S1

Sample ID:

Note:

Assay Name: CpG Assay D S1

Sample ID:

Note:

Assay Name: CpG Assay D S1

Sample ID:

Note:

Assay Name: CpG Assay D S1

Sample ID:

Note:

Assay Name: CpG Assay D S1

Sample ID:

Note:

Assay Name: CpG Assay D S1

Sample ID:

Note:

Assay Name: CpG Assay D S1

Sample ID:

Note:

Assay Name: CpG Assay D S1

Sample ID:

Note:

Assay Name: CpG Assay D S1

Sample ID:

Note:

Assay Name: CpG Assay D S1

Sample ID:

Note:

Assay Name: CpG Assay D S1

Sample ID:

Note:

Assay Name: CpG Assay D S1

Sample ID:

Note:

Assay Name: CpG Assay D S1

Sample ID:

Note:

Assay Name: CpG Assay D S1

Sample ID:

Note:

Assay Name: CpG Assay D S1

Sample ID:

Note:

Assay Name: CpG Assay D S1

Sample ID:

Note:

Assay Name: CpG Assay D S1

Sample ID:

Note:

Assay Name: CpG Assay D S1

Sample ID:

Note:

Assay Name: CpG Assay D S1

Sample ID:

Note:

Assay Name: CpG Assay D S1

Sample ID:

Note:

Assay Name: CpG Assay D S1

Sample ID:

Note:

Assay Name: CpG Assay D S1

Sample ID:

Note:

Assay Name: CpG Assay D S1

Sample ID:

Note:

Assay Name: CpG Assay D S1

Sample ID:

Note:

Assay Name: CpG Assay D S1

Sample ID:

Note:

Assay Name: CpG Assay D S1

Sample ID:

Note:

Assay Name: CpG Assay D S1

Sample ID:

Note:

Assay Name: CpG Assay D S1

Sample ID:

Note:

Assay Name: CpG Assay D S1

Sample ID:

Note:

Assay Name: CpG Assay D S1

Sample ID:

Note:
