# Supplementary material for: A pooling-based approach to mapping genetic variants associated with DNA methylation
Source: HighWire-hosted journal article supplement (doi:10.1101/gr.183749.114), 2015-04-24
Supplement: Sample_IDs_for_all_runs.xlsx [file Sample_IDs_for_all_runs.xlsx]

## Sheet: Sheet1
Assay_1_parents				Assay_2_parents				Assay_1 and 2 kids				Assay 3-5 kids				Assay 6-7				Assay 8				Assay 5_S2 (new sequencing primer)
A2	HF Assay 1	NA18501		A1	HF Assay 2	NA18501		A2	HF Assay 1	NA18500		A1	CpG assay 3_H to W	NA18500		A1	CpG Assay B S1	NA18500		A1	CpG Assay E	NA18500		A5	CpG Assay A_S2	NA18500
B2	HF Assay 1	NA18502		B1	HF Assay 2	NA18502		B2	HF Assay 1	NA18503		B1	CpG assay 3_H to W	NA18863		B1	CpG Assay B S1	NA18863		B1	CpG Assay E	NA18863		B5	CpG Assay A_S2	NA18863
C2	HF Assay 1	NA18504		C1	HF Assay 2	NA18504		C2	HF Assay 1	NA18506		C1	CpG assay 3_H to W	NA18503		C1	CpG Assay B S1	NA18503		C1	CpG Assay E	NA18503		C5	CpG Assay A_S2	NA18503
D2	HF Assay 1	NA18505		D1	HF Assay 2	NA18505		D2	HF Assay 1	NA18515		D1	CpG assay 3_H to W	NA18506		D1	CpG Assay B S1	NA18506		D1	CpG Assay E	NA18506		D5	CpG Assay A_S2	NA18506
E2	HF Assay 1	NA18507		E1	HF Assay 2	NA18507		E2	HF Assay 1	NA18521		E1	CpG assay 3_H to W	NA18521		E1	CpG Assay B S1	NA18521		E1	CpG Assay E	NA18521		E5	CpG Assay A_S2	NA18521
F2	HF Assay 1	NA18508		F1	HF Assay 2	NA18508		F2	HF Assay 1	NA18854		F1	CpG assay 3_H to W	NA18515		F1	CpG Assay B S1	NA18515		F1	CpG Assay E	NA18515		F5	CpG Assay A_S2	NA18515
G2	HF Assay 1	NA18516		G1	HF Assay 2	NA18516		G2	HF Assay 1	NA18857		G1	CpG assay 3_H to W	NA18854		G1	CpG Assay B S1	NA18854		G1	CpG Assay E	NA18854		G5	CpG Assay A_S2	NA18854
H2	HF Assay 1	NA18517		H1	HF Assay 2	NA18517		H2	HF Assay 1	NA18860		H1	CpG assay 3_H to W	NA18857		H1	CpG Assay B S1	NA18857		H1	CpG Assay E	NA18857		H5	CpG Assay A_S2	NA18857
A3	HF Assay 1	NA18522		A2	HF Assay 2	NA18522		A3	HF Assay 1	NA18863		A2	CpG assay 3_H to W	NA18860		A2	CpG Assay B S1	NA18860		A2	CpG Assay E	NA18860		A6	CpG Assay A_S2	NA18860
B3	HF Assay 1	NA18523		B2	HF Assay 2	NA18523		B3	HF Assay 1	NA18872		B2	CpG assay 3_H to W	NA18872		B2	CpG Assay B S1	NA18872		B2	CpG Assay E	NA18872		B6	CpG Assay A_S2	NA18872
C3	HF Assay 1	NA18852		C2	HF Assay 2	NA18852		C3	HF Assay 1	NA18914		C2	CpG assay 3_H to W	NA18914		C2	CpG Assay B S1	NA18914		C2	CpG Assay E	NA18914		C6	CpG Assay A_S2	NA18914
D3	HF Assay 1	NA18853		D2	HF Assay 2	NA18853		D3	HF Assay 1	NA19094		D2	CpG assay 3_H to W	NA19094		D2	CpG Assay B S1	NA19094		D2	CpG Assay E	NA19094		D6	CpG Assay A_S2	NA19094
E3	HF Assay 1	NA18855		E2	HF Assay 2	NA18855		E3	HF Assay 1	NA19100		E2	CpG assay 3_H to W	NA19100		E2	CpG Assay B S1	NA19100		E2	CpG Assay E	NA19100		E6	CpG Assay A_S2	NA19100
F3	HF Assay 1	NA18856		F2	HF Assay 2	NA18856		F3	HF Assay 1	NA19103		F2	CpG assay 3_H to W	NA19103		F2	CpG Assay B S1	NA19103		F2	CpG Assay E	NA19103		F6	CpG Assay A_S2	NA19103
G3	HF Assay 1	NA18858		G2	HF Assay 2	NA18858		G3	HF Assay 1	NA19120		G2	CpG assay 3_H to W	NA19120		G2	CpG Assay B S1	NA19120		G2	CpG Assay E	NA19120		G6	CpG Assay A_S2	NA19120
H3	HF Assay 1	NA18859		H2	HF Assay 2	NA18859		H3	HF Assay 1	NA19129		H2	CpG assay 3_H to W	NA19129		H2	CpG Assay B S1	NA19129		H2	CpG Assay E	NA19129		H6	CpG Assay A_S2	NA19129
A4	HF Assay 1	NA18861		A3	HF Assay 2	NA18861		A4	HF Assay 1	NA19132		A3	CpG assay 3_H to W	NA19132		A3	CpG Assay B S1	NA19132		A3	CpG Assay E	NA19132		A7	CpG Assay A_S2	NA19132
B4	HF Assay 1	NA18862		B3	HF Assay 2	NA18862		B4	HF Assay 1	NA19139		B3	CpG assay 3_H to W	NA19139		B3	CpG Assay B S1	NA19139		B3	CpG Assay E	NA19139		B7	CpG Assay A_S2	NA19139
C4	HF Assay 1	NA18870		C3	HF Assay 2	NA18870		C4	HF Assay 1	NA19142		C3	CpG assay 3_H to W	NA19142		C3	CpG Assay B S1	NA19142		C3	CpG Assay E	NA19142		C7	CpG Assay A_S2	NA19142
D4	HF Assay 1	NA18871		D3	HF Assay 2	NA18871		D4	HF Assay 1	NA19145		D3	CpG assay 3_H to W	NA19145		D3	CpG Assay B S1	NA19145		D3	CpG Assay E	NA19145		D7	CpG Assay A_S2	NA19145
E4	HF Assay 1	NA18912		E3	HF Assay 2	NA18912		E4	HF Assay 1	NA19154		E3	CpG assay 3_H to W	NA19154		E3	CpG Assay B S1	NA19154		E3	CpG Assay E	NA19154		E7	CpG Assay A_S2	NA19154
F4	HF Assay 1	NA18913		F3	HF Assay 2	NA18913		F4	HF Assay 1	NA19161		F3	CpG assay 3_H to W	NA19161		F3	CpG Assay B S1	NA19161		F3	CpG Assay E	NA19161		F7	CpG Assay A_S2	NA19161
G4	HF Assay 1	NA19092		G3	HF Assay 2	NA19092		G4	HF Assay 1	NA19173		G3	CpG assay 3_H to W	NA19173		G3	CpG Assay B S1	NA19173		G3	CpG Assay E	NA19173		G7	CpG Assay A_S2	NA19173
H4	HF Assay 1	NA19093		H3	HF Assay 2	NA19093		H4	HF Assay 1	NA19194		H3	CpG assay 3_H to W	NA19194		H3	CpG Assay B S1	NA19194		H3	CpG Assay E	NA19194		H7	CpG Assay A_S2	NA19194
A5	HF Assay 1	NA19098		A4	HF Assay 2	NA19098		A5	HF Assay 1	NA19202		A4	CpG assay 3_H to W	NA19202		A4	CpG Assay B S1	NA19202		A4	CpG Assay E	NA19202		A8	CpG Assay A_S2	NA19202
B5	HF Assay 1	NA19099		B4	HF Assay 2	NA19099		B5	HF Assay 1	NA19205		B4	CpG assay 3_H to W	NA19205		B4	CpG Assay B S1	NA19205		B4	CpG Assay E	NA19205		B8	CpG Assay A_S2	NA19205
C5	HF Assay 1	NA19101		C4	HF Assay 2	NA19101		C5	HF Assay 1	NA19208		C4	CpG assay 3_H to W	NA19208		C4	CpG Assay B S1	NA19208		C4	CpG Assay E	NA19208		C8	CpG Assay A_S2	NA19208
D5	HF Assay 1	NA19102		D4	HF Assay 2	NA19102		D5	HF Assay 1	NA19211		D4	CpG assay 3_H to W	NA19211		D4	CpG Assay B S1	NA19211		D4	CpG Assay E	NA19211		D8	CpG Assay A_S2	NA19211
E5	HF Assay 1	NA19116		E4	HF Assay 2	NA19116		E5	HF Assay 1	NA19221		E4	CpG assay 3_H to W	NA19221		E4	CpG Assay B S1	NA19221		E4	CpG Assay E	NA19221		E8	CpG Assay A_S2	NA19221
F5	HF Assay 1	NA19119		F4	HF Assay 2	NA19119		F5	HF Assay 1	NA19240		F4	CpG assay 3_H to W	NA19240		F4	CpG Assay B S1	NA19240		F4	CpG Assay E	NA19240		F8	CpG Assay A_S2	NA19240
G5	HF Assay 1	NA19127		G4	HF Assay 2	NA19127		G5	HF Assay 1	positive control for PCR		G4	CpG assay 3_H to W	NTC		G4	CpG Assay B S1	NTC		G4	CpG Assay E	NTC		G8	CpG Assay A_S2	NTC
H5	HF Assay 1	NA19128		H4	HF Assay 2	NA19128		H5	HF Assay 1	NTC		H4	CpG assay 3_H to W	NTC		H4	CpG Assay B S1	NTC		H4	CpG Assay E	NTC		H8	CpG Assay A_S2	NTC
A6	HF Assay 1	NA19130		A5	HF Assay 2	NA19130		A7	HF Assay 2	NA18500		A5	CpG 4	NA18500		A5	CpG Assay D S1	NA18500
B6	HF Assay 1	NA19131		B5	HF Assay 2	NA19131		B7	HF Assay 2	NA18503		B5	CpG 4	NA18863		B5	CpG Assay D S1	NA18863						Assay 4 redos
C6	HF Assay 1	NA19137		C5	HF Assay 2	NA19137		C7	HF Assay 2	NA18506		C5	CpG 4	NA18503		C5	CpG Assay D S1	NA18503						A9	CpG 4	NA18515
D6	HF Assay 1	NA19138		D5	HF Assay 2	NA19138		D7	HF Assay 2	NA18515		D5	CpG 4	NA18506		D5	CpG Assay D S1	NA18506						B9	CpG 4	NA19194
E6	HF Assay 1	NA19140		E5	HF Assay 2	NA19140		E7	HF Assay 2	NA18521		E5	CpG 4	NA18521		E5	CpG Assay D S1	NA18521						C9	CpG 4	NTC
F6	HF Assay 1	NA19141		F5	HF Assay 2	NA19141		F7	HF Assay 2	NA18854		F5	CpG 4	NA18515		F5	CpG Assay D S1	NA18515
G6	HF Assay 1	NA19143		G5	HF Assay 2	NA19143		G7	HF Assay 2	NA18857		G5	CpG 4	NA18854		G5	CpG Assay D S1	NA18854
H6	HF Assay 1	NA19144		H5	HF Assay 2	NA19144		H7	HF Assay 2	NA18860		H5	CpG 4	NA18857		H5	CpG Assay D S1	NA18857
A7	HF Assay 1	NA19152		A6	HF Assay 2	NA19152		A8	HF Assay 2	NA18863		A6	CpG 4	NA18860		A6	CpG Assay D S1	NA18860
B7	HF Assay 1	NA19153		B6	HF Assay 2	NA19153		B8	HF Assay 2	NA18872		B6	CpG 4	NA18872		B6	CpG Assay D S1	NA18872
C7	HF Assay 1	NA19159		C6	HF Assay 2	NA19159		C8	HF Assay 2	NA18914		C6	CpG 4	NA18914		C6	CpG Assay D S1	NA18914
D7	HF Assay 1	NA19160		D6	HF Assay 2	NA19160		D8	HF Assay 2	NA19094		D6	CpG 4	NA19094		D6	CpG Assay D S1	NA19094
E7	HF Assay 1	NA19171		E6	HF Assay 2	NA19171		E8	HF Assay 2	NA19100		E6	CpG 4	NA19100		E6	CpG Assay D S1	NA19100
F7	HF Assay 1	NA19172		F6	HF Assay 2	NA19172		F8	HF Assay 2	NA19103		F6	CpG 4	NA19103		F6	CpG Assay D S1	NA19103
G7	HF Assay 1	NA19192		G6	HF Assay 2	NA19192		G8	HF Assay 2	NA19120		G6	CpG 4	NA19120		G6	CpG Assay D S1	NA19120
H7	HF Assay 1	NA19193		H6	HF Assay 2	NA19193		H8	HF Assay 2	NA19129		H6	CpG 4	NA19129		H6	CpG Assay D S1	NA19129
A8	HF Assay 1	NA19200		A7	HF Assay 2	NA19200		A9	HF Assay 2	NA19132		A7	CpG 4	NA19132		A7	CpG Assay D S1	NA19132
B8	HF Assay 1	NA19201		B7	HF Assay 2	NA19201		B9	HF Assay 2	NA19139		B7	CpG 4	NA19139		B7	CpG Assay D S1	NA19139
C8	HF Assay 1	NA19203		C7	HF Assay 2	NA19203		C9	HF Assay 2	NA19142		C7	CpG 4	NA19142		C7	CpG Assay D S1	NA19142
D8	HF Assay 1	NA19204		D7	HF Assay 2	NA19204		D9	HF Assay 2	NA19145		D7	CpG 4	NA19145		D7	CpG Assay D S1	NA19145
E8	HF Assay 1	NA19206		E7	HF Assay 2	NA19206		E9	HF Assay 2	NA19154		E7	CpG 4	NA19154		E7	CpG Assay D S1	NA19154
F8	HF Assay 1	NA19207		F7	HF Assay 2	NA19207		F9	HF Assay 2	NA19161		F7	CpG 4	NA19161		F7	CpG Assay D S1	NA19161
G8	HF Assay 1	NA19209		G7	HF Assay 2	NA19209		G9	HF Assay 2	NA19173		G7	CpG 4	NA19173		G7	CpG Assay D S1	NA19173
H8	HF Assay 1	NA19210		H7	HF Assay 2	NA19210		H9	HF Assay 2	NA19194		H7	CpG 4	NA19194		H7	CpG Assay D S1	NA19194
A9	HF Assay 1	NA19222		A8	HF Assay 2	NA19222		A10	HF Assay 2	NA19202		A8	CpG 4	NA19202		A8	CpG Assay D S1	NA19202
B9	HF Assay 1	NA19223		B8	HF Assay 2	NA19223		B10	HF Assay 2	NA19205		B8	CpG 4	NA19205		B8	CpG Assay D S1	NA19205
C9	HF Assay 1	NA19238		C8	HF Assay 2	NA19238		C10	HF Assay 2	NA19208		C8	CpG 4	NA19208		C8	CpG Assay D S1	NA19208
D9	HF Assay 1	NA19239		D8	HF Assay 2	NA19239		D10	HF Assay 2	NA19211		D8	CpG 4	NA19211		D8	CpG Assay D S1	NA19211
E9	HF Assay 1	NTC		E8	HF Assay 2	NTC		E10	HF Assay 2	NA19221		E8	CpG 4	NA19221		E8	CpG Assay D S1	NA19221
A10	HF Assay 1	Low meth control		A9	HF Assay 2	Low meth control		F10	HF Assay 2	NA19240		F8	CpG 4	NA19240		F8	CpG Assay D S1	NA19240
B10	HF Assay 1	25% meth		B9	HF Assay 2	25% meth		G10	HF Assay 2	positive control for PCR		G8	CpG 4	NTC		G8	CpG Assay D S1	NTC
C10	HF Assay 1	75% meth		C9	HF Assay 2	75% meth		H10	HF Assay 2	NTC		H8	CpG 4	NTC		H8	CpG Assay D S1	NTC
D10	HF Assay 1	50% meth		D9	HF Assay 2	50% meth						A9	CpG Assay A minus	NA18500
E10	HF Assay 1	high meth		E9	HF Assay 2	high meth						B9	CpG Assay A minus	NA18863
F10	HF Assay 1	NTC		F9	HF Assay 2	NTC						C9	CpG Assay A minus	NA18503
												D9	CpG Assay A minus	NA18506
												E9	CpG Assay A minus	NA18521
												F9	CpG Assay A minus	NA18515
												G9	CpG Assay A minus	NA18854
												H9	CpG Assay A minus	NA18857
												A10	CpG Assay A minus	NA18860
												B10	CpG Assay A minus	NA18872
												C10	CpG Assay A minus	NA18914
												D10	CpG Assay A minus	NA19094
												E10	CpG Assay A minus	NA19100
												F10	CpG Assay A minus	NA19103
												G10	CpG Assay A minus	NA19120
												H10	CpG Assay A minus	NA19129
												A11	CpG Assay A minus	NA19132
												B11	CpG Assay A minus	NA19139
												C11	CpG Assay A minus	NA19142
												D11	CpG Assay A minus	NA19145
												E11	CpG Assay A minus	NA19154
												F11	CpG Assay A minus	NA19161
												G11	CpG Assay A minus	NA19173
												H11	CpG Assay A minus	NA19194
												A12	CpG Assay A minus	NA19202
												B12	CpG Assay A minus	NA19205
												C12	CpG Assay A minus	NA19208
												D12	CpG Assay A minus	NA19211
												E12	CpG Assay A minus	NA19221
												F12	CpG Assay A minus	NA19240
												G12	CpG Assay A minus	NTC
												H12	CpG Assay A minus	NTC
